1 **RESEARCH ARTICLE**

2 **eQTLs are key players in the integration of genomic and**  
3 **transcriptomic data for phenotype prediction**

4 Abdou Rahmane WADE<sup>1</sup>, Harold Duruflé<sup>1</sup>, Leopoldo Sanchez<sup>1\*</sup> and Vincent Segura<sup>2\*</sup>

5 <sup>1</sup> INRAE, ONF, BioForA, UMR 0588, F-45075 Orleans, France

6 <sup>2</sup> UMR AGAP Institut, Univ Montpellier, CIRAD, INRAE, Institut Agro, F-34398  
7 Montpellier, France

8 \*Correspondence: [leopoldo.sanchez-rodriguez@inrae.fr](mailto:leopoldo.sanchez-rodriguez@inrae.fr); [vincent.segura@inrae.fr](mailto:vincent.segura@inrae.fr)

9

10 **Short title:** Multi-omics phenotype prediction

11 **One-sentence summary:** Successful multi-omics integration when predicting  
12 phenotypes makes redundant the predictors that are linked to ubiquitous connections  
13 between the omics, according to biological and statistical approaches

14 **Abstract**

15 Multi-omics represent a promising link between phenotypes and genome variation. Few  
16 studies yet address their integration to understand genetic architecture and improve  
17 predictability. Our study used 241 poplar genotypes, phenotyped in two common  
18 gardens, with their xylem and cambium RNA sequenced at one site, yielding large  
19 phenotypic, genomic and transcriptomic datasets. For each trait, prediction models were  
20 built with genotypic or transcriptomic data and compared to concatenation integrating  
21 both omics. The advantage of integration varied across traits and, to understand such  
22 differences, we made an eQTL analysis to characterize the interplay between the  
23 genome and the transcriptome and classify the predicting features into CIS or TRANS  
24 relationships. A strong and significant negative correlation was found between the  
25 change in predictability and the change in predictor importance for eQTLs (both TRANS  
26 and CIS effects) and CIS regulated transcripts, and mostly for traits showing beneficial  
27 integration and evaluated in the site of transcriptomic sampling. Consequently,  
28 beneficial integration happens when redundancy of predictors is decreased, leaving the  
29 stage to other less prominent but complementary predictors. An additional GO  
30 enrichment analysis appeared to corroborate such statistical output. To our knowledge,  
31 this is a novel finding delineating a promising way to explore data integration.

32 **Keywords:** Genomic Prediction, omics, Multi-omics integration, eQTL, *Populus nigra*

### 33 **Introduction**

34 Genomic prediction, the prediction of phenotypes with genome-wide polymorphisms,  
35 has become a key tool to plant and animal breeders. This approach relies on statistical  
36 modelling to infer the effect of genomic variants, with many different modeling  
37 alternatives proposed in the literature (de los Campos et al., 2013; Varona et al., 2018).  
38 These models are mostly devised to predict the additive and transmissible contribution  
39 to individual genetic values, although dominance and epistatic interactions can also be  
40 accounted for Varona et al. (2018). Despite their success in identifying relevant effects  
41 and predicting phenotypes accurately, even in their most complex formulations, these  
42 models do not capture *per se* the genetic architecture of complex traits (Gianola, 2021).  
43 Beyond the statistics, it is the use of biological and functional information from the  
44 different organizational layers lying between the raw sequence and the organismal  
45 phenotype that will likely provide the required insights to reveal genetic architectures.  
46 Layers such as DNA methylation (Epigenome), transcripts (Transcriptome), proteins  
47 (Proteomics) or metabolites (Metabolites), are nowadays becoming increasingly  
48 accessible for many species, opening prospects towards a better understanding of the  
49 genetic architecture of complex traits.

50 In order to simultaneously account for these different layers of data in phenotype  
51 prediction, several integration approaches have been proposed (Ritchie et al., 2015).  
52 Among those, the most frequently used approach is the transformation or kernel-based  
53 integration, which consists in transforming each omics data into an intermediate form,  
54 usually taking the shape of a relationship matrix between the individuals (Guo et al.,  
55 2016; Schrag et al., 2018; Li et al., 2019; Morgante et al., 2020). Effects owing to  
56 different omics can then be integrated into a single analytical model, each effect being  
57 associated to a given kernel. Eventually, different kernels can be further combined by  
58 Hadamard product to add extra interaction terms between effects (Guo et al., 2016;  
59 Morgante et al., 2020). Integration can also be carried out across models, in what is  
60 known as model-based integration (Ritchie et al., 2015). Such integration can happen  
61 for a given omic type over different datasets or populations, each one summarized by its  
62 own model, with a final global model feeding on the top features contributed by each of  
63 the initial models. Another variant of the same model-based integration proceeds  
64 through a multistage approach, combining sequentially different omics for a given  
65 population (Ye et al., 2020). One of the simplest integration approaches, however,  
66 remains data concatenation (Azodi et al., 2020), by which multiple omics are placed  
67 side by side into a single large input matrix. Unlike kernels, whose results are produced  
68 at the individual level, the concatenation approach allows for the effects of multiple  
69 features at each omic to be estimated, whether they are SNPs, transcripts or any other  
70 omic. Another advantage, derived from that atomization of effects, is the fact that

71 interactions between omics can be more easily captured, without the risk of being lost  
72 by intermediate transformations.

73 Most of the studies dealing with omics integration for phenotypic prediction have  
74 focused on gauging predictive abilities. To that level, the reported benefits of integration  
75 are context dependent across studies and, in general, amounting to small differences  
76 when compared to single omics counterparts. A series of published comparisons in  
77 maize illustrates this point. Using kernels to integrate genomic and transcriptomic data,  
78 Guo et al. (2016) found improved accuracies over single omic counterparts for most of  
79 the 11 economically important traits under study. Schrag et al. (2018), on the contrary,  
80 found no benefit in integration following a similar approach and on a similar set of  
81 production-related traits. For Azodi et al. (2020), however, using concatenation of  
82 genomic and transcriptomic data for three maize traits yielded benefits only for one of  
83 the traits. Studies on other biological models also showed similar context dependent  
84 results. Based on the *Drosophila melanogaster* Reference Panel and different  
85 transcriptomic datasets, Li et al. (2019) and Morgante et al. (2020) found subsequently  
86 no benefit of integration following a multiple kernel approach in terms of predictive  
87 abilities, and over different sets of fitness-related traits. When the integration included a  
88 gene ontology (GO) category as an additional layer of information, accuracies were  
89 surprisingly improved (Morgante et al., 2020). Using the same *Drosophila* panel,  
90 however, Ye et al. (2020) found some benefits by following a model-based integration  
91 approach, with a first modeling stage aiming at detecting SNP associated with  
92 transcripts (eQTLs), and a subsequent prediction model focused on resulting eQTLs.  
93 The number of studies, however, is not yet high enough to draw general conclusions.  
94 Benefits might depend jointly on methods of integration and targeted traits, reflecting the  
95 complexity of underlying architectures and conditions of studied populations.

96 Beyond the reported differences in prediction performance, there is still a scarcer  
97 number of studies available that were able to pinpoint some of the possible causes  
98 underlying the changes brought by integration to prediction. Already, at statistical level,  
99 omics like sequence polymorphisms and transcriptomics are likely non-orthogonal to  
100 some extent. If such redundancy is not conveniently handled at the model level, one  
101 can expect inaccurate estimation of effects and impaired prediction accuracy as a result  
102 (Farrar and Glauber, 1967; Ritchie et al., 2015). Redundancy between genomic and  
103 transcriptomic data was addressed in a few studies, typically by gauging the amount of  
104 extra variance captured by the different integration models compared to single omic  
105 counterparts. For instance, the successful integration described by Guo et al. (2016)  
106 was systematically accompanied by extra levels of captured variance, suggesting that  
107 each extra layer added to the model contributed to some extent with non-redundant  
108 information, and thus improving the prediction. The opposite behavior is described in  
109 Morgante et al. (2020), with integrative models showing similar levels of captured

110 variance to those of single omics, indicating high levels of redundancy. It is interesting  
111 to note here that for this latter study, redundancy was not found between GO terms, the  
112 only layer bringing benefits to integration in the study. The most explanatory GO terms  
113 with genomic data were different from those detected for transcriptomic data. The  
114 second, more biological, approach is to look to what extent the most important features  
115 in both omics show at the same time mutual associations, in other words, if relevant  
116 SNPs are associated or not to relevant transcripts for a given phenotype. Azodi et al.  
117 (2020) showed, in maize, that the transcriptome brings information on the phenotype  
118 that is different from the one brought by genomic polymorphisms, by highlighting that  
119 the information carried by the most important transcripts to predict flowering time is not  
120 redundant with that carried out by the most important SNPs. In mice, two independent  
121 studies used a Bayesian approach to model the phenotype with both genomic and  
122 transcriptomic data (Ehsani et al., 2012; Takagi et al., 2014). These studies showed that  
123 specific SNPs (eQTLs) associated with gene expression profiles can contribute to the  
124 observed redundancy between the two data sources, which is reflected by the fact that  
125 their importance for phenotype prediction was substantially affected under the  
126 integrative approach.

127 Further research is needed to enrich the number of studies in data integration. It is clear  
128 that the mechanisms by which integration is successful when predicting phenotypes are  
129 still not known precisely and over a wide range of conditions and species, with the  
130 hypothesis of redundancy being one of the possible explanations. To some extent,  
131 redundancy reflects interactivity in the highly integrative space going from the raw  
132 genomic sequence to the organismal phenotype. Both redundancy and interactivity are  
133 key features to understand genetic architecture beyond the simple list of effects that is  
134 typically provided by genomic approaches. Most of the available studies on data  
135 integration involve model species like *Drosophila*, maize, and notably humans. In the  
136 present study, we proposed new insights on data integration for a species not frequently  
137 found as subject of these approaches, black poplar, and using one of the simplest  
138 integration alternatives (concatenation) combined to one of the most popular prediction  
139 approaches (ridge regression). Here, we aimed at evaluating the factors affecting  
140 prediction accuracy when integrating genomic and transcriptomic data for phenotype  
141 prediction. Using a fairly large number of diverse phenotypes collected in two common  
142 gardens for a collection of black poplars, we specifically analyzed the change in  
143 importance of each of the potentially redundant sources (eQTLs and their target genes)  
144 between a multi-omics model and the single omics counterparts, together with the  
145 evolution of prediction accuracy. Under a more functional point of view, we further  
146 studied the redundancy using a Gene ontology (GO) enrichment analysis.

## 147 Results

### 148 Multi-omics model displays performance advantages over the single omic ones 149 for specific functional types of traits

150 Twenty-one traits of different types were phenotyped (**Table 1**) from 241 poplars grown  
151 in two common garden experiments located at contrasting sites (Orleans, France, and  
152 Savigliano, Italy). RNA sequencing analysis was also performed on young differentiating  
153 xylem and cambium tissues of the entire set of genotypes sampled in the common  
154 garden located at Orleans, resulting in large genomic (428,836 SNPs) and  
155 transcriptomic (34,229 transcripts) datasets. For each phenotypic trait, three ridge  
156 regression models were built: the first one with genotypic data as predictors (denoted  
157 G), the second one with transcriptomic data as predictors (T), and the third one with  
158 integration by concatenation of both omics data (G+T). The prediction accuracies for the  
159 three models varied across trait types, with growth, pathogen tolerance and phenology  
160 traits having average performances above 0.5 on both testing sites, while biochemical  
161 and architectural traits having average performances below 0.5 (**Figure 1**).

162 We compared for each trait the prediction accuracies of both the single omic models  
163 with the multi-omics model, and tested if they significantly differed with a paired  
164 Wilcoxon signed-rank test. Over all traits, the differences between the average accuracy  
165 of multi-omics model compared to the single omic models ranged from -0.025 to 0.054.  
166 Seven of the 21 traits showed a significant gain with the multi-omics model over both  
167 the single omic models. These 7 traits included all the growth traits, the pathogen  
168 resistance trait, as well as 3 of the 14 biochemical traits (S.G\_ORL, Extractives\_ORL  
169 and Extractives\_SAV). It is noteworthy that most of these traits (5/7) were measured in  
170 Orleans, the site where transcriptomics data were also collected. The only 2 traits  
171 presenting an advantage for the multi-omics model at the Italian site (Circ and  
172 Extractives) were also advantageous on the French site. Some traits showed a  
173 significant loss of accuracy with the multi-omics model, two (Lignin\_ORL, Lignin\_SAV)  
174 when the comparison was against the G counterpart, and four (Lignin\_ORL,  
175 Lignin\_SAV, Glucose\_SAV and C5.C6\_SAV) when it was with T model. Of note, all  
176 these traits displaying a decrease in accuracy with the multi-omics model were  
177 biochemical traits, they had low prediction accuracies and were more often than not  
178 measured in Savigliano (3 in Italy versus 1 in France).

179 In summary, the multi-omics model showed performance advantages over the single  
180 omic models in 7 of the 21 traits, more frequently on traits measured in Orleans where  
181 transcriptomic data were collected than in the Italian site. The multi-omics model  
182 underperformed the single omic models on 4 occasions, corresponding to 3 traits

183 measured in Italy and one in Orleans. For the 10 remaining traits, no differences  
184 between models were detected (**Figure 1 and Supplemental Table S1**).

## 185 **eQTL analysis sheds light into the interplay between the genome and the** 186 **transcriptome**

187 To further gain insight into the interplay between the two omics layers for phenotype  
188 prediction, we studied their relationships through an eQTL analysis. Such analysis was  
189 performed with two specific detection steps, the first ignoring linkage disequilibrium  
190 between SNPs (called Step\_0) and the second detecting multi-locus eQTLs (called  
191 Step\_opt). The resulting eQTLs at both steps were further classified into CIS and  
192 TRANS regulatory elements according to their genomic proximity with the transcripts  
193 there were associated with (for more details see the method section). **Figure 2** and  
194 **Supplemental Figure S1** presents a map of these associations, respectively for  
195 step\_opt and Step\_0, with dot size reflecting the eQTL score. The darkened diagonal  
196 includes all CIS mediated associations, while the off-diagonal dots represent TRANS  
197 eQTLs. It is important to note that some positions at the marker axis present highly  
198 populated vertical trails across the genome, corresponding to important regulatory hubs.

199 For both detection stages, we found eQTLs for 10,242 out of the 34,229 transcripts  
200 available in the transcriptomic dataset. Step\_0 detected a total of 119,022 eQTLs on the  
201 marker dataset, including 72,841 (61.2%) CIS regulatory elements and 46,181 (38.8%)  
202 TRANS regulatory elements. At the optimal step of the eQTLs analysis (Step\_opt),  
203 which accounted for linkage disequilibrium between SNPs, we detected a total of  
204 18,248 eQTLs, of which 7,845 (43%) were CIS regulatory elements, and 10,403 (57%)  
205 were TRANS regulatory elements (**Supplemental Figure S2A**). CIS eQTLs displayed  
206 on average a larger effect than TRANS eQTLs (**Supplemental Figure S2B**). This  
207 point explains why there were so many at step\_0, while their number drastically  
208 decreased at step\_opt when LD was accounted for by the multi-locus approach.  
209 Whatever the step considered, the maximum distance between CIS eQTLs and their  
210 associated genes ranged between 12 and 14 kb.

## 211 **The importance of predictors is less preserved for traits displaying a predictive** 212 **advantage with integration**

213 To get insights into the factors explaining the gain or loss in predictive ability when using  
214 two omics by comparison with a single omic, we further looked at the variation in  
215 importance of the individual predictors over the two types of predictive models. For each  
216 of the three models, the importance of the different predictors was estimated as the rank  
217 of their squared effects from the ridge regression models.

218 We looked at correlations between the importance of predictors across single and multi-  
219 omics models, splitting the predictors into three categories determined from the eQTL  
220 analysis: TRANS eQTLs or regulated transcripts, CIS eQTLs or regulated transcripts  
221 and no eQTL. For SNPs, the correlation between the importances ranged from 0.62 to  
222 0.99 across traits and predictor typologies. They were generally lower for the traits that  
223 also showed advantages with the G+T model over single omic models, and for those  
224 measured in the French site. Rust resistance, for instance, had the lowest correlations  
225 across the different categories among all measured traits (0.62, 0.63 and 0.65,  
226 respectively for TRANS eQTLs, CIS eQTLs and non eQTLs). Also, growth traits  
227 showed relatively low correlations compared to most of the traits, although this  
228 happened only for measurements in the French site (Ht\_ORL, Circ\_ORL), with those in  
229 the Italian site (Circ\_SAV) being much higher and comparable to the top correlations.  
230 For the remaining traits, correlations between importances remained high, generally  
231 above 0.9 but with a few values close to 0.8 (**Supplemental Figure S3A**). The  
232 correlations between transcript importances (**Supplemental Figure S3B**) were  
233 generally lower than those for SNPs, varying between 0.52 and 0.89 across traits and  
234 predictor categories. Following a similar pattern as for SNPs, the traits showing the  
235 lowest correlations were also those for which the multi-omics displayed a predictive  
236 advantage over single omic models, as well as those measured in the French site.  
237 Growth and rust resistance traits were those showing the lowest correlations. Although  
238 with small differences, CIS-regulated transcripts showed lower correlations than those  
239 from TRANS-regulated counterparts, across traits and sites.

#### 240 **TRANS-eQTLs show the most important changes of squared effect rank between** 241 **multi-omics and single omic models**

242 Previous correlations pinpointed to changes in importance in some of the categories of  
243 predictors. Such changes can be illustrated by the difference in importance (rank of  
244 squared effect) between the multi-omics model and that of the single omic model (either  
245 T or G, for transcripts and SNPs respectively) (see Methods for details).

246 When looking at the variation of the differences in importance (**Supplemental Figure**  
247 **S4, Figure S4**), the amounts were much larger for eQTLs (G+T versus G) than for  
248 targeted transcripts (G+T versus T). Higher variations were also found for TRANS  
249 eQTLs than for CIS counterparts, and for traits phenotyped at Orleans than for those in  
250 the Italian site. Thus, changes in importance occurred with more intensity for eQTLs,  
251 with a TRANS regulation, and linked to traits measured where the transcripts were  
252 sampled.

253 An alternative way of visualizing those changes is represented in **Figure 3**. This time,  
254 changes were averaged for a given trait and the resulting distribution of averages

255 represented by predictor category and site. Patterns were very different between eQTLs  
256 and targeted transcripts, and also between sites. The most important changes in  
257 ranking happened at the Orleans site. With respect to predictor typologies, it was  
258 TRANS-eQTLs that showed the most important changes, with an overall loss of  
259 importance when switching to the G+T model, notably for the traits benefiting the most  
260 in performance from concatenation (growth and rust resistance). Less conspicuous  
261 were the changes for CIS-eQTLs, overall of negative sign but of lesser magnitude. Non-  
262 eQTLs showed generally small changes across traits. For targeted transcripts, the most  
263 impacted typology was CIS regulated genes, with an overall loss in ranking across  
264 traits, notably for growth and rust resistance traits.

### 265 **A negative relationship exists between the change in importance of eQTLs and CIS** 266 **regulated transcripts and the predictive ability of the integrated multi-omic model**

267 **Figure 4** represents the link across traits between average change in importance of  
268 predictors and advantage in performance of multi-omics over the single omic  
269 counterpart. In the case of eQTLs-TRANS, generally the most affected predictors  
270 following concatenation, a significant relationship ( $r=-0.81$ ,  $p=0.0015$ ) can be drawn  
271 where gains in prediction occurred at the expense of losses in ranking of predictors. A  
272 similar pattern, although of lesser magnitude, is to be found for eQTLs-CIS and CIS  
273 regulated genes ( $r=-0.6$ ,  $p=0.037$  and  $r=-0.64$ ,  $p=0.024$ , respectively). No significant link  
274 was found for TRANS regulated genes. An equivalent representation for the Savigliano  
275 site showed no significant links across categories of predictors (**Supplemental Figure**  
276 **S6**).

### 277 **Gene ontology analysis suggests that top targeted transcripts or eQTLs are trait** 278 **specific**

279 We further selected the transcripts or eQTLs whose importance was most affected  
280 through data integration, by focusing on the 1% percentile at each extreme of the  
281 distributions, and carried an enrichment analysis in GO terms on the resulting features  
282 (**Figure 5 and Supplemental Table S2**).

283 For all type of traits, the analysis of the GOs showed enrichment of terms from general  
284 cell cycle process (e.g. "regulation of RNA export", "regulation of nucleobase", "positive  
285 regulation of RNA, vesicle-mediated transport") in the lists of eQTL gene models  
286 selected as having the most negative impact on their importance during integration. The  
287 same results were visible for all traits with the lists of targeted transcripts selected with a  
288 negative effect, the GO terms enrichment were associated to ubiquity process like  
289 "protein targeting to chloroplast" or "protein localization to chloroplast" in the



290 circumference of the tree trunk study (**Figure 5A**) or "phosphorelay signal transduction"  
291 and "cellular response to ethylene" for the lignin content study (**Figure 5B**).

292 For traits that showed significant gain with integration, this analysis suggests that the list  
293 of targeted genes with the most positive effects under integration are enriched with  
294 different terms specific to the traits. For example, we found cell wall related terms like  
295 "cell wall polysaccharide catabolic process", "xylan metabolic process" for the  
296 circumference of the tree (**Figure 5A**). The same results were found for the eQTL gene  
297 models selected with the most positive effects with specific GO terms for tree  
298 circumference like "formation of plant organ" or "formation of anatomical boundary".

299 On the contrary, in traits that showed significant predictive losses with multi-omics  
300 model over single omic ones, like the lignin content (**Figure 5B**), showed also  
301 enrichment in GO terms of general process for the most positive effect targeted  
302 transcripts or eQTL gene models (e.g. "nucleic acid metabolic process", "gene  
303 expression" for the targeted transcripts and "cellular lipid catabolic", "fatty acid catabolic  
304 process" for the eQTL gene models).

## 305 **Discussion**

306 In this study, we used 21 traits to compare the relative advantages of integrating  
307 genomic and transcriptomic data for phenotype prediction versus using each omic  
308 separately. This relative advantage of integration over single omic varied across traits.  
309 For traits such as growth and pathogen resistance, integration yielded more accurate  
310 predictions than the single omic counterparts, while for most of the others, basically  
311 biochemical traits, no difference was detected, with still a few cases of underperforming  
312 concatenation. By using a simple modeling approach like ridge regression, we showed  
313 that gains in the traits benefited by integration were associated with systematic changes  
314 in importance for some specific predictors, and that those predictors were involved in  
315 the interplay between SNP polymorphisms and transcripts, pinpointing at adjustments in  
316 effects due to redundancies. Such findings at the statistical level were also backed up  
317 by a subsequent biological analysis of GO terms.

318 In order to better understand the reasons underlying trait differences in the benefits of  
319 concatenation, we sought to evaluate the interplay between the genomic and  
320 transcriptomic data, by making use of an eQTL analysis. Such analysis allowed us firstly  
321 to categorize the predictors into CIS eQTLs, TRANS eQTLs, non eQTLs, CIS regulated  
322 transcripts, TRANS regulated transcripts and transcripts with no eQTL detected.  
323 Secondly, based on such categorization, we could quantify the changes in predictor  
324 importance for each of these categories when using the multi-omics model by  
325 comparison with single omic ones. Over all the traits under study, we found a strong

326 negative and significant correlation between the relative advantage of the multi-omics  
327 model compared to the single omic ones and the drop in importance of the predictors  
328 for eQTLs ( $R=-0.81$  for TRANS eQTLs and  $R=-0.6$  for CIS eQTLs) and transcripts  
329 regulated in CIS ( $R=-0.64$ ). Such a relationship could be interpreted in terms of  
330 redundancy between predictors coming from different omics. Indeed, the traits that  
331 benefited the most from concatenation were also those for which TRANS eQTLs and  
332 CIS-regulated transcripts lost the most in terms of importance in the combined  
333 predictive model compared to the single omic counterparts, and thus for which the  
334 combined model decreased the redundancy between predictors by down weighting  
335 those that specifically matter for the eQTL versus transcript covariation. Redundancy,  
336 *per se*, would not necessarily explain gains or loss in performance, but down weighting  
337 redundant predictors could allow other minor predictors, otherwise silenced, climb in  
338 importance in such a way that the concatenation model improved in predictability.

339 To our knowledge, this study is the first to establish such a relationship between  
340 integration success and redundancy between omics layers, pinpointing eQTLs as key  
341 players in such interplay. It is worth mentioning that we could establish such a  
342 relationship because of the relatively large number of traits under study, compared to  
343 previous works (Ehsani et al., 2012; Guo et al., 2016; Morgante et al., 2020; Azodi et  
344 al., 2020; Li et al., 2019; Takagi et al., 2014; Schrag et al., 2018). The relative gains  
345 from integration ranged from  $-0.02$  to  $+0.05$   $R^2$  across all 21 traits. These gains are  
346 indeed small, but are consistent with the state of the art. However, our objective here  
347 was to attempt to understand the factors that underlie this gain in order to produce new  
348 knowledge that will allow us to improve in more consequent ways the advantage of  
349 integration with other methods.

### 350 **A gain of integration was mainly found for traits related to growth and for traits** 351 **evaluated in the same location as transcriptomic evaluation**

352 We observed a significant advantage of multi-omics over single omic for all growth-  
353 related traits (Ht\_ORL, Circ\_ORL and Circ\_SAV). Since growth results from cell division  
354 and expansion in the apical and cambial meristems (Xylem and cambium) (Chaffey et  
355 al., 2002) this relationship between the tissues from which we extracted transcripts and  
356 the growth traits (circumference and height) may explain the significant integration  
357 advantage observed for these traits.

358 The advantage of integration over the single omic models was also observed for leaf  
359 rust resistance. Although xylem and cambium, the tissues sampled for RNA  
360 sequencing, seem disconnected to a phenomenon occurring at the leaf level, the  
361 relationship here is likely indirect since links between resistance and growth have been  
362 reported by other studies (Wang and Kamp, 1992; Steenackers et al., 1996; Newcombe

363 et al., 2001). Following the same reasoning, phenology and architectural traits  
364 considered here do not show clear relationships with cambial meristems or with growth-  
365 related traits, and therefore support the lack of benefits observed for them in the  
366 concatenation models.

367 For the majority of wood biochemical traits, the multi-omics integration model performed  
368 similarly or worse than the single omic model. It is noteworthy that these traits are  
369 overall not well predicted with single or multi-omics, and they originally come from near  
370 infrared spectroscopy prediction which may have included some noise to their variation.  
371 We could hypothesize that this factor underlies the observed poor performance for this  
372 category of traits during integration.

373 These series of observations across traits also point to the idea that transcripts capture  
374 some new information not necessarily available for SNPs, such as that associated to  
375 the genic interplays occurring at the specific tissue sampled for transcripts, which could  
376 be of a non-additive nature (gene-gene interactions), or even genotype-by-environment  
377 interaction effects, which are both not explicitly modelled when using exclusively SNPs  
378 as predictors.

379 Among the 21 analysed traits, we observed that the benefits of the concatenation model  
380 happened more often for the traits measured in Orleans where the transcriptomic data  
381 were also collected than for those in the Italian site. This advantage when phenotypic  
382 and transcriptomic data evaluation are carried out at the same location can be  
383 interpreted in terms of genotype-environment interactions effectively captured by the  
384 transcripts (Buil et al., 2015; Idaghdour and Awadalla, 2013). Conversely, for  
385 phenotypes evaluated at the Italian site, the transcriptomic data more likely bring  
386 redundant information to that of SNPs, which in turn do not result in any advantage in  
387 the multi-omic integration.

### 388 **Negative change in rank between the two models implies an increase in** 389 **importance**

390 Our goal was to identify factors that influence the success of genomic and  
391 transcriptomic data integration for phenotype prediction. To this end, we chose a simple  
392 integration method that allows us to track changes in the importance of each variable  
393 between the integration model and the single omic models. As described in Zampieri et  
394 al. (2019) and Ritchie et al. (2015), there are several ways to integrate multi-omics data,  
395 the simplest being the concatenation method. Using a ridge regression model,  
396 concatenation allows to directly estimate each predictor effect, accounting for all other  
397 variables (SNPs and transcripts), unlike LASSO and elastic-net where some degree of  
398 variable selection is applied, while trying to minimize the covariation between the  
399 predictors' effects. This method allowed us to track the evolution of the relative

400 importance of the predictors in the multi-omics model compared to the single models,  
401 and therefore infer potential redundancies by the changes in importance. Since the  
402 effects of SNPs or transcripts between the two models are not at the same scale to  
403 gauge importances, we had to bring them to a common scale. A simple and efficient  
404 way to do this is to work with ranks of the squared effects of predictors.

405 Comparing the changes in ranks between the multi-omics model and the single omic  
406 ones informed us about the gain or loss in importance of each predictor. A predictor will  
407 have a positive change in rank when it has high importance (low rank) under the single  
408 omic models and ends up with low importance (high rank) in the multi-omics model.  
409 Conversely, a negative change in rank between the two models implies an increase in  
410 importance. A zero rank change corresponds to a predictor that keeps the same  
411 importance between the two models.

### 412 **Integration success is driven by the loss in importance of covariation sources** 413 **between genomics and transcriptomics**

414 Our main hypothesis was that sources of redundancy between SNPs and transcripts  
415 play an important role in the success of the integration. The ideal candidates as a  
416 source of redundancy between SNPs and transcripts are eQTLs and the genes they  
417 regulate, so we performed an eQTL analysis to identify eQTLs (CIS and TRANS) and  
418 their regulated genes among our dataset. In order to remain in the same framework as  
419 in the ridge prediction models, we used the results of the eQTL analysis for which  
420 linkage disequilibrium was not taken into account, which enabled us to get information  
421 at the SNP level rather than at the locus level. However, the SNPs in our dataset are  
422 derived from RNAseq and are representative of the functional space of the genome,  
423 thus capturing few SNPs in the intergenic spaces. This might have affected our ability to  
424 detect some TRANS-eQTLs. Nevertheless, our multi-locus analysis showed that  
425 TRANS-eQTLs remained the majority, with some hotspot or hub loci associated with a  
426 fairly large number of transcripts. Such behavior has previously been reported in other  
427 species such as yeast (Albert et al., 2018) or maize (Liu et al., 2017; Swanson-Wagner  
428 et al., 2009).

429 The main results of our study is the strong negative and significant correlation found  
430 between the relative advantage of the multi-omic model over the single omic ones and  
431 the average importance losses of the eQTLs (more pronounced for TRANS) and the  
432 genes regulated in CIS. It is important to note here that CIS-regulated genes are on  
433 average regulated by more eQTLs than their TRANS-regulated counterparts, 10.15 and  
434 6.63 eQTLs respectively (**Supplemental Figure S7**), suggesting that CIS-regulated  
435 genes are the source of more redundancies than TRANS-regulated genes in our  
436 dataset. To our knowledge, this study is the first to establish this direct relationship

437 between integration success and losses in the importance of eQTLs and regulated  
438 genes. This relationship was possible to establish due to the relatively large number of  
439 diverse traits that we used.

440 There are results obtained in other studies that indirectly suggest the importance of  
441 eQTLs for multi-omics integration between genomics and transcriptomics. Ehsani et al.  
442 (2012) observed in mice losses in importance of eQTLs in the combined genomics and  
443 transcriptomics model versus the model with only genomics for the phenotype that  
444 shows an advantage of integration (body mass). Such behavior of eQTLs in this study  
445 was observed only for a single phenotype with low resolution genotyping data. Also, Ye  
446 et al. (2020) were successful in improving the performance of phenotype prediction in  
447 *Drosophila* using genotypes of eQTLs regulating genes that are important for the  
448 phenotype. They proceeded with successive selection steps involving a transcriptome  
449 wide association study (TWAS) with an eQTLs analysis for the TWAS significant genes,  
450 while optimizing the detection thresholds of these two analyses. Their results indirectly  
451 suggest the importance of eQTLs for the integration between genomics and  
452 transcriptomics. The negative correlation between the relative advantage of the multi-  
453 omics model over the single omic ones and the average losses in importance of  
454 covariation sources suggests that the integration success is driven by a minimization of  
455 the redundancy between genomics and transcriptomics. Azodi et al. (2020) observed in  
456 maize that concatenation between genomic and transcriptomic data improves the  
457 prediction of one of their 3 studied phenotypes. For this phenotype, they showed that  
458 the most important SNPs and transcripts were not redundant in the sense that they  
459 were not located in the same genomic regions, nor were they regulators of important  
460 transcripts.

#### 461 **The observed redundancy may be explained by biological processes**

462 Up to now, we have shown statistically that the sources of redundancy were penalized  
463 with a weaker importance under integration. Our GO enrichment analysis provided a  
464 more biological point of view to bring extra evidence of the role of redundancy.  
465 Generally speaking, genes pointing at general ubiquitous biological processes were  
466 more likely the source of redundancy, while those associated with specific processes  
467 could more easily bring extra useful information to the prediction process. The GO  
468 analysis showed that genes gaining in prediction importance under integration were  
469 generally associated with specialized processes of relevance for the predicted  
470 phenotype. This pattern was observed notably for traits related to wood production. On  
471 the contrary, the genes that were most heavily affected in their importance under  
472 integration showed a characteristic enrichment of terms linked to the general cell cycle  
473 processes. As the transcriptomic data came from young differentiating xylem and  
474 cambium tissues, the redundancy (and complementarity) that we observed is strongly

475 associated with phenotypes related to the production of wood, like the trunk  
476 circumference. This interpretation of our results might also apply to the loss of prediction  
477 for traits whose genes are not likely to be represented in our transcriptome, such as  
478 those related to rust resistance for example. One eventual validation could be to  
479 complement the transcriptomic data with alternative collection on tissues other than  
480 those closely connected to xylem and cambium, like leaves, and work on traits more  
481 specifically expressed on the collected tissue (i.e. rust resistance). If the genes  
482 associated with the general biological processes are found to be sources of redundancy  
483 through GO analysis, one strategy to improve prediction could be to reduce or minimize  
484 their contribution to the models.

## 485 **Perspectives**

486 One of the main findings of this study is the fact that certain predictors with ubiquitous  
487 connections seem to be made redundant when integration takes place, leaving the  
488 stage for other features to be picked up, eventually less prominent but bringing true  
489 complementarity to the integrative prediction. For the sake of simplicity, our study could  
490 not take the extra step to devise a novel alternative to account for such redundancies.  
491 However, it would be quite straightforward to outline a basic strategy where the  
492 importance of predictors going into the model is penalized according to some function  
493 describing their redundancy in the data. Under kernel-based integration, for instance,  
494 some kind of optimization of composition in features included in the relatedness  
495 matrices could be devised so that the resulting kernels bring complementary  
496 information. Under a model-based integration, a multistage approach could be devised  
497 where associations between all involved omics are firstly carried out, so that the  
498 features contributing the most to the associations can be subsequently penalized to  
499 some degree or filtered out when it comes to construct a consensual model. More  
500 research would be required to devise and test a strategy to derive robust weightings.

501 It would be essential to gather extra information on the beneficial role of multiple omics,  
502 collected at different development stages or distinct tissues, so that links to different  
503 traits can be drawn. This is certainly a costly endeavor, which could be focused on  
504 specific training populations. Ideally, integration studies on those training sets would  
505 allow us to identify important hubs in the genetic architecture of traits, and use that  
506 information for differential weighting on other related populations with no or basic  
507 access to extra omics layers.

## 508 **Material and methods**

### 509 **Plant material, experimental design and phenotypic evaluation**

510 We studied 241 genotypes of *Populus nigra* originated from 11 major river catchments  
511 across 4 countries and representative of the species range in Western Europe. These  
512 poplars were evaluated in common garden experiments located on 2 contrasting sites  
513 (Orleans noted ORL and Savigliano noted SAV) (Guet et al., 2015). In each site, the  
514 experimental design consisted in a randomized complete block design with 6 blocks,  
515 and thus 6 repetitions per genotype. Twelve traits were evaluated on the 2 sites, as  
516 previously described (Gebreselassie et al., 2017; Chateigner et al., 2020). We  
517 considered traits measured in 2 sites as different traits, leading to a total of 21 traits  
518 (detailed in **Table 1**). These traits can be categorized into 5 types: growth, pathogen  
519 tolerance, phenology, architecture, and biochemistry. At Orleans, the trees were grown  
520 through 3 successive cycles: 2008-2009, 2010-2011 and 2012-2015. During the first  
521 growth cycle (2009), rust tolerance (Rust) was measured with a discrete score from 1  
522 (no symptom) to 8 (generalized symptoms), as detailed in Legionnet et al. (1999).  
523 Average branch angle (BrAngl) was evaluated with a score on proleptic shoots from 1 to  
524 4 (score 1: between 0° and 30°; score 2: between 30° and 40°; score 3: between 40°  
525 and 55°; score 4: and between 55° and 90°). During the second growth cycle, height (Ht)  
526 and circumference at 1-meter above the ground (Circ) were measured on 2 year-old  
527 trees (winter 2011). At Savigliano, trees went through two cycles: 2008-2009 and 2009-  
528 2010. Only Circ was measured during the second growth cycle on 2 year-old trees  
529 (winter 2010). Biochemical traits consisted in predictions of several chemical  
530 compounds obtained from near-infrared spectra on wood samples collected in the same  
531 years as growth traits and at both sites, as described in Gebreselassie et al. (2017).  
532 Biochemical traits included: extractives content (Extractives), total lignin content  
533 (Lignin), ratios between different lignin components like p-hydroxyphenyl (H), guaiacyl  
534 (G) and syringyl (S) (H.G, S.G), total Glucose content (Glucose), ratio between Xylose  
535 and Glucose content (XylGlu) and the ratio between 5 and 6 carbon sugars (C5.C6).  
536 One phenological trait was also measured, BudFlush as discrete scores for a given day  
537 of the year, measured on the apical bud (Dillen et al., 2009).

## 538 **Phenotype adjustments**

539 All 21 traits were independently adjusted to field micro-environmental heterogeneity  
540 using the breedR package (Munoz and Sanchez, 2017). The model included blocks and  
541 spatial effects (autoregressive residuals function) to account for micro-environmental  
542 heterogeneity. Also a model selection was carried out using the AIC to select the effects  
543 to be included in the model and to tune the autoregressive parameters. The genotypic  
544 adjusted means from these models were used as phenotype for this study.

## 545 **Genotype and transcriptomic data**

546 RNA sequencing was carried out in 2015 on young differentiating xylem and cambium  
547 tissues collected on two replicates of the 241 genotypes located into two blocks of the  
548 Orleans design (Chateigner et al., 2020). We obtained sequencing reads for 459  
549 samples corresponding to 218 genotypes with two replicates and 23 genotypes with 1  
550 replicate. These sequencing reads were used to provide both transcriptomic and  
551 genomic data.

552 For transcriptomic data, the reads were mapped on the *Populus trichocarpa* v3.0  
553 primary transcripts and read counts were retrieved for 41,335 transcripts. Only  
554 transcripts with at least 1 count in 10% of the individuals were kept, yielding 34,229  
555 features. The raw count data were normalized by Trimmed Mean of M-values using the  
556 R package edgeR v3.26.4 (Robinson and Oshlack, 2010) and we calculated the counts  
557 per millions (Law et al., 2014). To make the CPM data fit a Gaussian distribution, we  
558 computed a  $\log_2(n+1)$  instead of a  $\log_2(n+0.5)$  typically used in a voom analysis (Law et  
559 al., 2014), to avoid negative values, which are problematic for the rest of the analysis.  
560 For each transcript the  $\log_2(n+1)$  of the CPM were fitted with a mixed model including  
561 experimental (batch) and genetic effects to extract their genotypic blups. Those  
562 transcripts' genotypic blups were used for the rest of our analysis.

563 The genotyping data was obtained, first by mapping the RNAseq reads on the *P.*  
564 *trichocarpa* genome reference (v3.0) (Goodstein et al., 2012). After the mapping, the  
565 SNPs were called using 4 callers. In order to generate a high-confidence SNP set we  
566 selected only the SNPs identified by at least 3 of the 4 callers and with less than 50% of  
567 missing values. Remaining missing values were imputed using complementary  
568 genotyping data obtained with a 12k Illumina Infinium Bead-Chip array (Faivre-Rampant  
569 et al., 2016). Full details of SNP discovery, data filtering criteria and final selection are  
570 given in Rogier et al. (2018). We then detected 874,923 SNPs. From these detected  
571 SNPs 428,836 SNPs were retained for this study after filtering the SNPs with minimum  
572 alleles frequencies lower than 0.05.

### 573 **eQTLs Analysis**

574 eQTLs analysis was performed using the Multi-Loci Mixed-Model (MLMM) approach  
575 (Segura et al., 2012) and implemented in the R package MLMM v0.1.1. MLMM uses a  
576 step-by-step forward inclusion and backward elimination approach under a mixed-model  
577 framework which accounts for the confounding usually attributed to population structure  
578 with a random polygenic effect. For each of the 34,229 transcripts we ran MLMM for up  
579 to 10 steps and identified the optimal model according to the mBonf criterion (all  
580 selected SNPs are significant at a 5% Bonferroni corrected threshold). The initial and  
581 the optimal steps outputs have been saved for further analyses.



582 Based on the positional proximity of the genes, the eQTLs detected at each of these 2  
583 steps were classified as CIS regulatory elements (non-coding DNA regulating the  
584 transcription of neighboring genes), and/or as TRANS regulatory elements (regulating  
585 the transcription of distant genes), according to the following rules:

- 586 - all eQTLs associated with the expression of a gene located in a different  
587 chromosome are classified as TRANS, and the targeted gene is classified as a  
588 TRANS regulated gene;
- 589 - all eQTLs located on the same locus as the gene it targets, according to the  
590 genome annotation, are classified as CIS, and the targeted gene is also  
591 classified as CIS regulated gene;
- 592 - the remaining eQTLs whose target gene is on the same chromosome but not on  
593 the same locus, were splitted into CIS or TRANS according to their distance to  
594 the middle of the gene they target. We estimated the maximum distance between  
595 the CIS eQTLs identified at previous step and the middle of the gene they target  
596 as 18.9 kb (eQTL being on the same position as its target gene). If the distance  
597 between eQTLs and the gene they target is greater than 18.9 kb they were  
598 classified as eQTLs TRANS and target Gene TRANS. Otherwise, the eQTLs and  
599 the target gene were classified as CIS.

## 600 **Models, prediction accuracy and cross-validation**

601 Two ridge regression models were built for each trait with a single omic data as  
602 predictor, genotypic data (**G** model), or transcriptomic data (**T** model), respectively with  
603  $p = 428,836$  SNPs and  $q = 34,229$  transcripts' expression levels variables. A third multi-  
604 omic was also built with integration by concatenation of both omics data (**G+T** model).  
605 These 3 models can be written as:

$$606 \quad Y = \mathbf{X}\beta + \epsilon \quad (\text{eq 1})$$

607 Respectively for models **G,T** and **G+T**, **X** represent the genotyping matrix ( $n \times p$ ), the  
608 transcript expression level matrix for the genes ( $n \times q$ ) and the concatenated transcript  
609 expression level and genotyping matrix ( $n \times (p + q)$ ). With the same logic,  $\beta$  represent  
610 the vector of effect sizes of variables of those matrices. Y is the vector of phenotype,  
611 and  $\epsilon$  the vector of residual errors of the model.

612 The models were computed using the R package glmnet (Friedman et al., 2010) in a 5  
613 inner-fold and 10 outer-fold nested cross validation framework (Varma and Simon,  
614 2006). The sampling process for the different folds was repeated 50 times. Each cross-  
615 validation sample was used across all traits and for the three models. Paired t-tests in R  
616 (rstatix package version 0.7.0) (Kassambara, 2021) were used for model comparisons  
617 of performance.

618 The models performances was measured using  $R^2$  between observed and predicted  
619 values.

## 620 **SNPs and transcript effects ranking**

621 In order to study the changes operated for each feature (SNP or gene) when changing  
622 prediction models from single omics to the concatenated counterpart, we compared the  
623 change in ranking of the effects across models. Ranks were obtained for each  
624 predicting model and trait from the ordering of squared effect sizes.

625 For each variant typologies, the estimated effects rank was compared between the  
626 single omic models (**G** or **T**) and the multi-omics model with a paired wilcoxon test and a  
627 Pearson correlation.

628 The difference in effect ranking between the model with concatenation and the single  
629 omic models was calculated for the different typologies of each feature (SNPs and  
630 genes). Then this ranking difference was averaged for each trait and regressed with the  
631 concatenation advantage of each trait, which is the average accuracy difference  
632 between the concatenation model and the single omics models:

$$633 \Delta_{\text{predictor}} = \frac{1}{\omega} \sum_{i=1}^{\omega} \left( \frac{R_i}{(G+T)} - \frac{R_i}{(G \text{ or } T)} \right) \text{ (eq 2)}$$

634 Predictor represents either SNPs or transcripts. R is the ranking vector of squared effect  
635 sizes of the given predictor.  $\omega$  is the number of predictors (p for SNPs and q for  
636 transcripts).  $\Delta_{\text{predictor}}$  is the average difference in effect ranking between the multi-omics  
637 model and the single omic one by trait for the given predictor.

## 638 **GO analysis**

639 Functional enrichment was conducted based on the gene ontology (GO) terms  
640 associated with the best *Arabidopsis thaliana* homolog and based on Phytozome  
641 v12.1.6 database (Goodstein et al., 2012). GO analysis was conducted using R  
642 package topGO 2.44.0 (Alexa and Rahnenfuhrer, 2021) and Fisher's exact test with  
643 'elim' used to correct for multiple comparisons. The significant threshold of GO terms  
644 was  $P \leq 0.05$ .

## 645 **Availability of data and code**

646 Supporting data is available at: <https://doi.org/10.15454/8DQXK5>

647 Code for running the test and replicate the analysis are available at:

648 <https://github.com/Tawfekh/Code-Article-Multi-omics-prediction>

## 649 **Acknowledgements**

650 The authors gratefully acknowledge the staff of the INRAE GBFOR experimental unit for  
651 the establishment and management of the poplar experimental design in Orléans, the  
652 collection of wood samples in each site, and their contribution to phenotypic  
653 measurements on poplars in Orléans; Alasia Franco Vivai staff for management of the  
654 poplar experimental plantation in Savigliano, and M. Sabatti and F. Fabbrini for their  
655 contribution to phenotypic measurements on poplars in Savigliano. We acknowledge  
656 the staff of BioForA for their contribution to RNA collection in the field. We also  
657 acknowledge the platform POPS for their implication with RNA sequencing and  
658 sequence analyses and Odile Roger for her contribution to sequence analyses.

659 Establishment and management of the experimental sites were carried out with financial  
660 support from the NOVELTREE project (EU-FP7-211868). RNA collection, extraction,  
661 and sequencing were supported by the SYBIOPOP project (ANR-13-JSV6-0001)  
662 funded by the French National Research Agency (ANR). This study was funded by the  
663 European Union Horizon 2020 research and innovation programme under grant  
664 agreement No 773383 (B4EST project) and by INRAE SELGEN metaprogramme  
665 (EPINET project).

## 666 **Author contributions**

667 ARW: analyzed all the data and wrote the manuscript; HD: performed GO analyzes and  
668 wrote the manuscript; LS and VS: planned and designed the project, supervised the  
669 research and wrote the manuscript.

## 670 References

- 671 **Albert, F.W., Bloom, J.S., Siegel, J., Day, L., and Kruglyak, L.** (2018). Genetics of trans-  
672 regulatory variation in gene expression. *eLife* **7**: e35471.
- 673 **Alexa, A. and Rahnenfuhrer, J.** (2021). topGO: Enrichment Analysis for Gene Ontology  
674 (Bioconductor version: Release (3.13)).
- 675 **Azodi, C.B., Pardo, J., VanBuren, R., Campos, G. de los, and Shiu, S.-H.** (2020).  
676 Transcriptome-Based Prediction of Complex Traits in Maize. *The Plant Cell* **32**: 139–  
677 151.
- 678 **Buil, A., Brown, A.A., Lappalainen, T., Viñuela, A., Davies, M.N., Zheng, H.-F., Richards,  
679 J.B., Glass, D., Small, K.S., Durbin, R., Spector, T.D., and Dermitzakis, E.T.** (2015).  
680 Gene-gene and gene-environment interactions detected by transcriptome sequence  
681 analysis in twins. *Nat Genet* **47**: 88–91.
- 682 **de los Campos, G., Hickey, J.M., Pong-Wong, R., Daetwyler, H.D., and Calus, M.P.L.**  
683 (2013). Whole-Genome Regression and Prediction Methods Applied to Plant and Animal  
684 Breeding. *Genetics* **193**: 327–345.
- 685 **Chaffey, N., Cholewa, E., Regan, S., and Sundberg, B.** (2002). Secondary xylem  
686 development in Arabidopsis: a model for wood formation. *Physiologia Plantarum* **114**:  
687 594–600.
- 688 **Chateigner, A., Lesage-Descauses, M.-C., Rogier, O., Jorge, V., Leplé, J.-C., Brunaud, V.,  
689 Roux, C.P.-L., Soubigou-Taconnat, L., Martin-Magniette, M.-L., Sanchez, L., and  
690 Segura, V.** (2020). Gene expression predictions and networks in natural populations  
691 supports the omnigenic theory. *BMC Genomics* **21**: 416.
- 692 **Dillen, S.Y., Storme, V., Marron, N., Bastien, C., Neyrinck, S., Steenackers, M., Ceulemans,  
693 R., and Boerjan, W.** (2009). Genomic regions involved in productivity of two interspecific  
694 poplar families in Europe. 1. Stem height, circumference and volume. *Tree Genetics &  
695 Genomes* **5**: 147–164.
- 696 **Ehsani, A., Sørensen, P., Pomp, D., Allan, M., and Janss, L.** (2012). Inferring genetic  
697 architecture of complex traits using Bayesian integrative analysis of genome and  
698 transcriptome data. *BMC Genomics* **13**: 456.
- 699 **Faivre-Rampant, P. et al.** (2016). New resources for genetic studies in *Populus nigra*: genome-  
700 wide SNP discovery and development of a 12k Infinium array. *Molecular Ecology  
701 Resources* **16**: 1023–1036.
- 702 **Farrar, D.E. and Glauber, R.R.** (1967). Multicollinearity in Regression Analysis: The Problem  
703 Revisited. *The Review of Economics and Statistics* **49**: 92–107.
- 704 **Friedman, J., Hastie, T., and Tibshirani, R.** (2010). Regularization Paths for Generalized  
705 Linear Models via Coordinate Descent. *J Stat Softw* **33**: 1–22.
- 706 **Gebreselassie, M.N. et al.** (2017). Near-infrared spectroscopy enables the genetic analysis of  
707 chemical properties in a large set of wood samples from *Populus nigra* (L.) natural  
708 populations. *Industrial Crops and Products* **107**: 159–171.
- 709 **Gianola, D.** (2021). Opinionated Views on Genome-Assisted Inference and Prediction During a  
710 Pandemic. *Frontiers in Plant Science* **12**: 1533.
- 711 **Goodstein, D.M., Shu, S., Howson, R., Neupane, R., Hayes, R.D., Fazo, J., Mitros, T., Dirks,  
712 W., Hellsten, U., Putnam, N., and Rokhsar, D.S.** (2012). Phytozome: a comparative  
713 platform for green plant genomics. *Nucleic Acids Research* **40**: D1178–D1186.
- 714 **Guet, J., Fabbrini, F., Fichot, R., Sabatti, M., Bastien, C., and Brignolas, F.** (2015). Genetic  
715 variation for leaf morphology, leaf structure and leaf carbon isotope discrimination in  
716 European populations of black poplar (*Populus nigra* L.). *Tree Physiology* **35**: 850–863.
- 717 **Guo, Z., Magwire, M.M., Basten, C.J., Xu, Z., and Wang, D.** (2016). Evaluation of the utility of  
718 gene expression and metabolic information for genomic prediction in maize. *Theor Appl  
719 Genet* **129**: 2413–2427.

- 720 **Idaghdour, Y. and Awadalla, P.** (2013). Exploiting Gene Expression Variation to Capture  
721 Gene-Environment Interactions for Disease. *Frontiers in Genetics* **3**: 228.
- 722 **Kassambara, A.** (2021). rstatix: Pipe-Friendly Framework for Basic Statistical Tests.
- 723 **Law, C.W., Chen, Y., Shi, W., and Smyth, G.K.** (2014). voom: precision weights unlock linear  
724 model analysis tools for RNA-seq read counts. *Genome Biology* **15**: R29.
- 725 **Legionnet, A., Muranty, Hé., and LefÈvre, F.** (1999). Genetic variation of the riparian pioneer  
726 tree species *Populus nigra*. II. Variation in susceptibility to the foliar rust *Melampsora*  
727 *larici-populina*. *Heredity* **82**: 318–327.
- 728 **Li, Z., Gao, N., Martini, J.W.R., and Simianer, H.** (2019). Integrating Gene Expression Data  
729 Into Genomic Prediction. *Front. Genet.* **10**.
- 730 **Liu, H., Luo, X., Niu, L., Xiao, Y., Chen, L., Liu, J., Wang, X., Jin, M., Li, W., Zhang, Q., and**  
731 **Yan, J.** (2017). Distant eQTLs and Non-coding Sequences Play Critical Roles in  
732 Regulating Gene Expression and Quantitative Trait Variation in Maize. *Molecular Plant*  
733 **10**: 414–426.
- 734 **Morgante, F., Huang, W., Sørensen, P., Maltecca, C., and Mackay, T.F.C.** (2020).  
735 Leveraging Multiple Layers of Data To Predict *Drosophila* Complex Traits. *G3*  
736 *Genes|Genomes|Genetics* **10**: 4599–4613.
- 737 **Munoz, F. and Sanchez, L.** (2017). breedR: statistical methods for forest genetic resources  
738 analysis. <https://github.com/famuvie/breedR>. R package version 0.12-2.
- 739 **Newcombe, G., Stirling, B., and Bradshaw, H.D.** (2001). Abundant Pathogenic Variation in  
740 the New Hybrid Rust *Melampsora xcolumniana* on Hybrid Poplar. *Phytopathology* **91**:  
741 981–985.
- 742 **Ritchie, M.D., Holzinger, E.R., Li, R., Pendergrass, S.A., and Kim, D.** (2015). Methods of  
743 integrating data to uncover genotype–phenotype interactions. *Nature Reviews Genetics*  
744 **16**: 85–97.
- 745 **Robinson, M.D. and Oshlack, A.** (2010). A scaling normalization method for differential  
746 expression analysis of RNA-seq data. *Genome Biology* **11**: R25.
- 747 **Rogier, O., Chateigner, A., Amanzougarene, S., Lesage-Descauses, M.-C., Balzergue, S.,**  
748 **Brunaud, V., Caius, J., Soubigou-Taconnat, L., Jorge, V., and Segura, V.** (2018).  
749 Accuracy of RNAseq based SNP discovery and genotyping in *Populus nigra*. *BMC*  
750 *Genomics* **19**: 909.
- 751 **Schrag, T.A., Westhues, M., Schipprack, W., Seifert, F., Thiemann, A., Scholten, S., and**  
752 **Melchinger, A.E.** (2018). Beyond Genomic Prediction: Combining Different Types of  
753 omics Data Can Improve Prediction of Hybrid Performance in Maize. *Genetics* **208**:  
754 1373–1385.
- 755 **Segura, V., Vilhjálmsson, B.J., Platt, A., Korte, A., Seren, Ü., Long, Q., and Nordborg, M.**  
756 (2012). An efficient multi-locus mixed-model approach for genome-wide association  
757 studies in structured populations. *Nat Genet* **44**: 825–830.
- 758 **Steenackers, J., Steenackers, M., Steenackers, V., and Stevens, M.** (1996). Poplar  
759 diseases, consequences on growth and wood quality. *Biomass and Bioenergy* **10**: 267–  
760 274.
- 761 **Swanson-Wagner, R.A., DeCook, R., Jia, Y., Bancroft, T., Ji, T., Zhao, X., Nettleton, D., and**  
762 **Schnable, P.S.** (2009). Paternal Dominance of Trans-eQTL Influences Gene Expression  
763 Patterns in Maize Hybrids. *Science*.
- 764 **Takagi, Y., Matsuda, H., Taniguchi, Y., and Iwaisaki, H.** (2014). Predicting the Phenotypic  
765 Values of Physiological Traits Using SNP Genotype and Gene Expression Data in Mice.  
766 *PLOS ONE* **9**: e115532.
- 767 **Varma, S. and Simon, R.** (2006). Bias in error estimation when using cross-validation for model  
768 selection. *BMC Bioinformatics* **7**: 91.
- 769 **Varona, L., Legarra, A., Toro, M.A., and Vitezica, Z.G.** (2018). Non-additive Effects in  
770 Genomic Selection. *Frontiers in Genetics* **9**: 78.

- 771 **Wang, J. and Kamp, B.J. van der** (1992). Resistance, tolerance, and yield of western black  
772 cottonwood infected by *Melampsora* rust. *Can. J. For. Res.* **22**: 183–192.
- 773 **Ye, S., Li, J., and Zhang, Z.** (2020). Multi-omics-data-assisted genomic feature markers  
774 preselection improves the accuracy of genomic prediction. *J Animal Sci Biotechnol* **11**:  
775 109.
- 776 **Zampieri, G., Vijayakumar, S., Yaneske, E., and Angione, C.** (2019). Machine and deep  
777 learning meet genome-scale metabolic modeling. *PLOS Computational Biology* **15**:  
778 e1007084.

## 779 **Figure legends**

### 780 **Figure 1: Prediction accuracies**

781 Violin plots of prediction accuracies for 21 traits in the poplar dataset according to three  
782 models, using only genotyping data (the G model colored in dark brown to the left in the  
783 panels), using only transcriptomic data (T model colored in dark blue), and  
784 concatenating both genotyping and transcriptomic data (G+T model colored in light  
785 brown to the right). Each distribution of accuracies resulted from a cross-validation  
786 scheme. Significance from paired tests is shown for comparisons between models, with  
787 a sign indicating if the accuracy is increased (+) or decreased (-) in the multi-omics  
788 model by comparison with the single omic ones. Some traits were evaluated in two sites  
789 (“ORL” standing for Orléans in France and “SAV” for Savigliano in Italy). The white and  
790 black dots show the median and mean of the precision distributions, respectively. The  
791 dark brown and dark blue horizontal lines represent respectively the mean of precision  
792 distributions of G and T models.

793

### 794 **Figure 2: eQTL map between SNPs and transcripts**

795 Map of associations (dots) between SNPs and transcripts through an eQTLs analysis  
796 with multi locus detection (Step\_op), with dot size reflecting the association score (-  
797 log<sub>10</sub> of the p-value of the test). The darkened diagonal includes all CIS mediated  
798 associations, while the off-diagonal dots represent the TRANS associations.

799

### 800 **Figure 3: Distribution of predictors’ change in importance**

801 Boxplot of the average change in importance of SNPs (panels A) and transcripts  
802 (panels B). Each dot represents the average difference per trait and per site of the  
803 predictor ranks between the multi omics model (G+T) and the single omic models (G for  
804 SNPs and T for transcripts). The red and blue boxplots show respectively the  
805 distribution of the average rank change for the TRANS-eQTLs and CIS-eQTLs. The  
806 boxplot in black shows the distribution for the predictors that have not been detected in  
807 the eQTL analysis.

808

### 809 **Figure 4: Relationship between predictors’ change in importance and multi-omics 810 prediction advantage**

811 Regression across traits measured at Orleans between average change in importance  
812 of predictors and advantage in performance of G+T over the single-omic counterpart.  
813 The top panel (A) shows the regression obtained with the eQTLs (TRANS-eQTLs on the  
814 left and CIS-eQTLs on the right). The bottom panel (B) shows the regression obtained  
815 with the regulated genes (TRANS on the left and CIS on the right).

816

### 817 **Figure 5: Gene ontology terms enrichment analysis**

818 Schematic representation of the enriched GO terms among the top targeted transcripts  
819 or eQTL gene models list for A) the circumference of the tree trunk or B) the lignin  
820 content evaluated at Orleans. Font size and color intensity are proportional to -log<sub>10</sub>(p)  
821 of the top 10 GO terms.

## 822 **Supplemental Data**

823 **Supplemental Figure S1:** eQTL map between SNPs and transcripts (Step\_0)

824 **Supplemental Figure S2:** Abundance and score of CIS and TRANS eQTLs

825 **Supplemental Figure S3:** Comparison between the importance of predictors across  
826 single and multi-omics models

827 **Supplemental Figure S4:** Variation of the change in importance of the eQTLs and  
828 targeted transcripts

829 **Supplemental Figure S5:** Change in importance of the eQTLs and their corresponding  
830 targeted transcripts

831 **Supplemental Figure S6:** Relationship between predictors change in importance and  
832 multi-omics prediction advantage for traits measured at Savigliano

833 **Supplemental Figure S7:** Average number of connection for the eQTLs and targeted  
834 transcripts

835 **Supplemental Table S1:** Prediction accuracies comparison between the multi-omics  
836 model and the single omic ones

837 **Supplemental Table S2:** Complete gene ontology analysis of all traits



838 **Tables**

839 **Table 1: List of phenotypic traits**

840 List of phenotypic traits used in the study with their abbreviations, classified by  
841 functional types, with site of measurement and year.

| Functional types   | Trait                    | Abbreviation | Site | Year |
|--------------------|--------------------------|--------------|------|------|
| Growth             | Height                   | Ht           | ORL  | 2011 |
|                    | Circumference            | Circ         | ORL  | 2011 |
|                    |                          |              | SAV  | 2009 |
| Pathogen Tolerance | Tolerance to rust        | Rust         | ORL  | 2009 |
| Phenology          | Date of bud flush        | BudFlush     | ORL  | 2009 |
|                    |                          |              | SAV  | 2011 |
| Architecture       | Branching angle          | BrAngl       | ORL  | 2009 |
| Biochemical        | H/G lignin ratio         | H.G          | ORL  | 2011 |
|                    |                          |              | SAV  | 2009 |
|                    | S/G lignin ratio         | S.G          | ORL  | 2011 |
|                    |                          |              | SAV  | 2009 |
|                    | Lignin content           | Lignin       | ORL  | 2011 |
|                    |                          |              | SAV  | 2009 |
|                    | Glucose content          | Glucose      | ORL  | 2011 |
|                    |                          |              | SAV  | 2009 |
|                    | Xylose to glucose ratio  | Xyl.Glu      | ORL  | 2011 |
|                    |                          |              | SAV  | 2009 |
|                    | 5C/6C carbon sugar ratio | C5.C6        | ORL  | 2011 |
|                    |                          |              | SAV  | 2009 |
|                    | Extractives content      | Extractives  | ORL  | 2011 |
|                    |                          |              | SAV  | 2009 |

842

— NS — Signif - — Signif +    ■ G ■ T ■ G+T

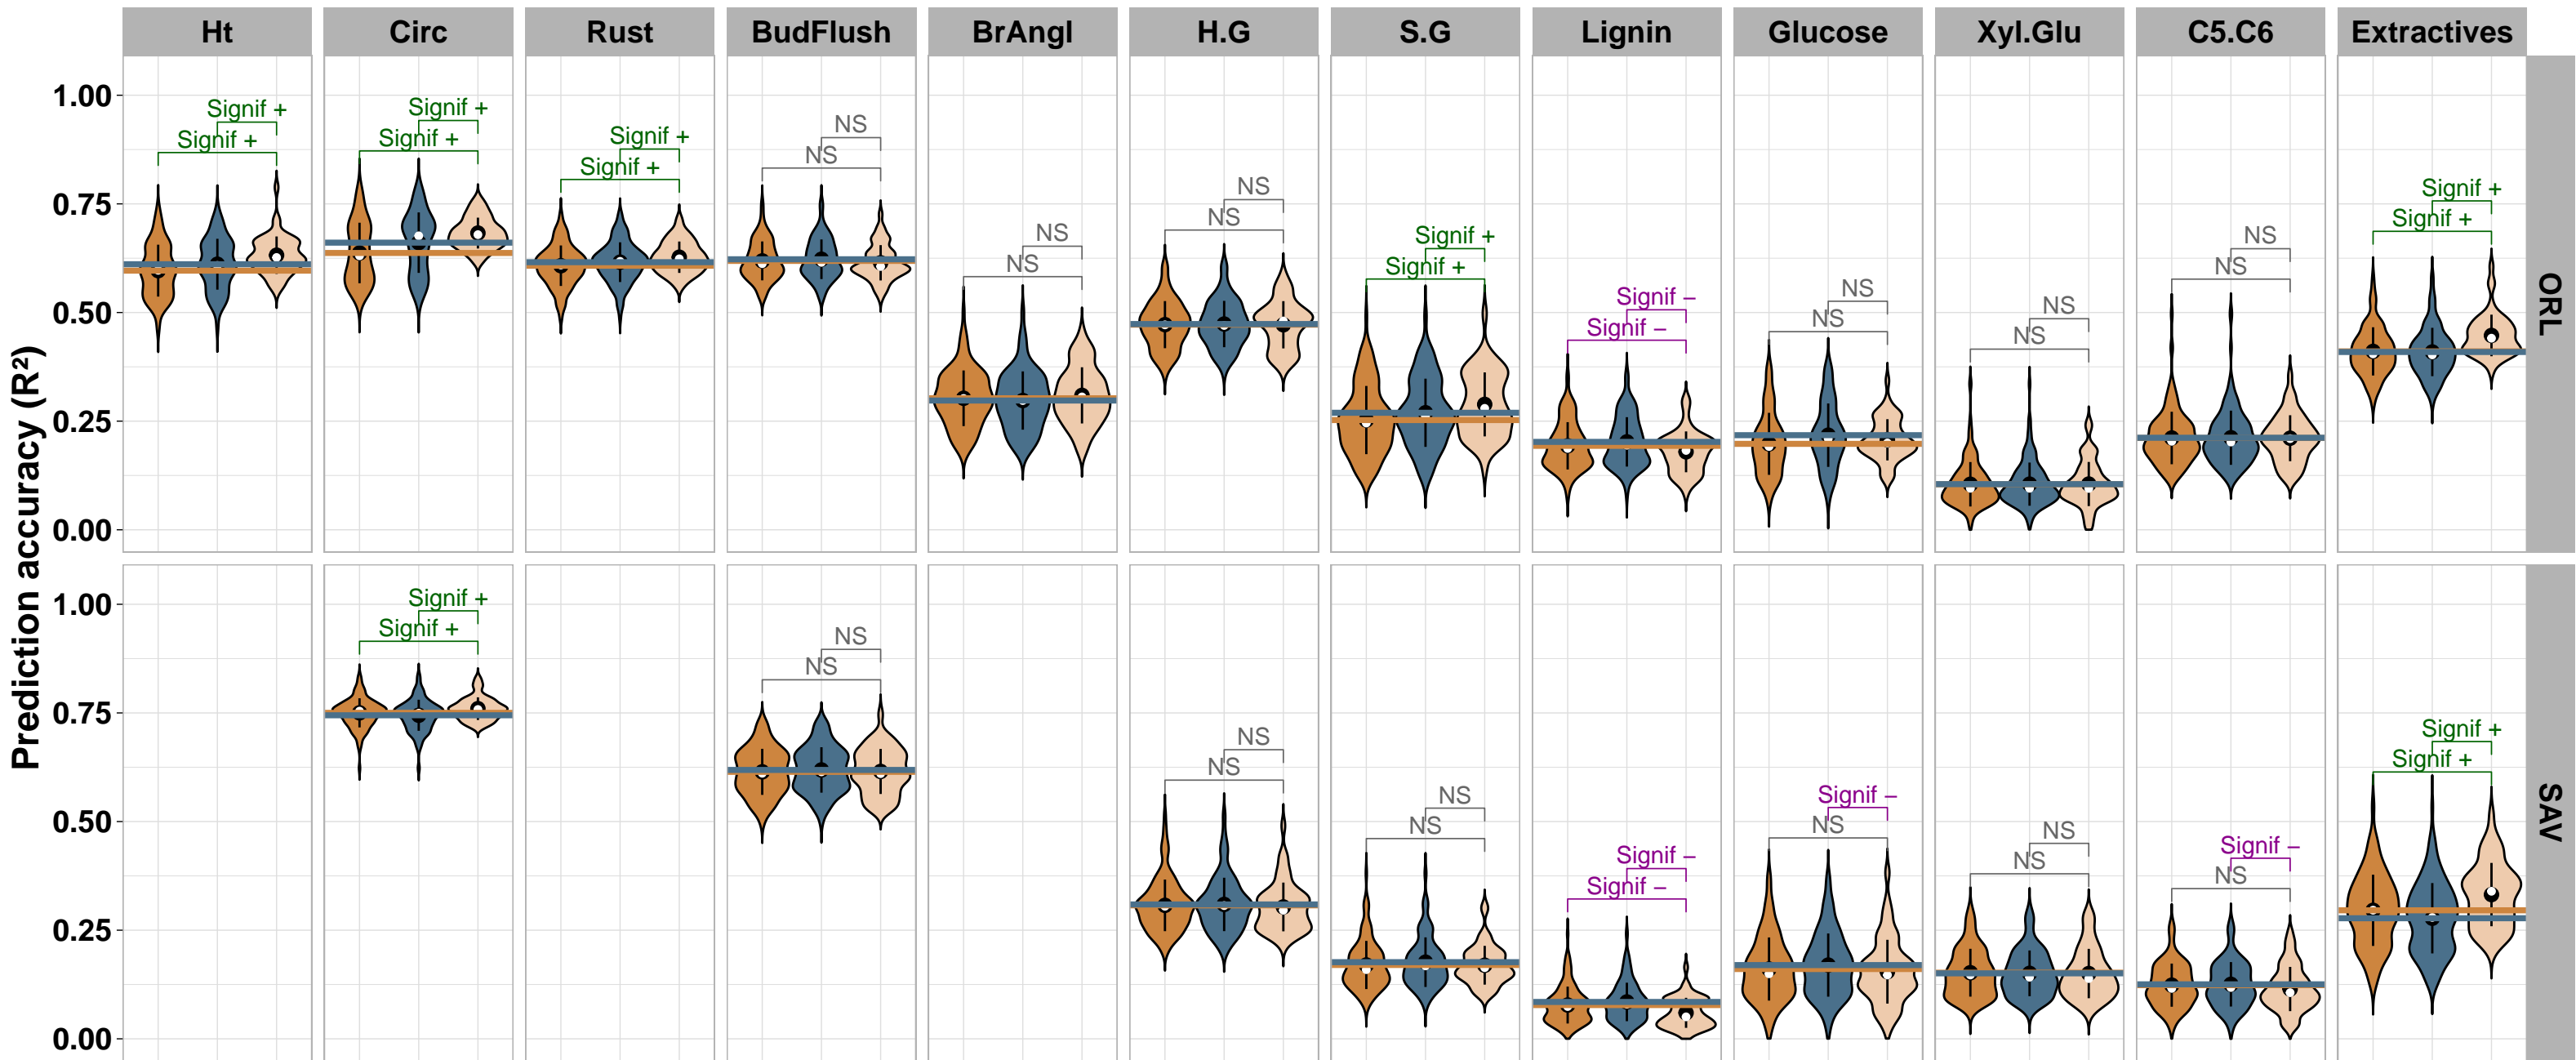

eQTL score : ● 0-40 ● 40-80 ● 80-120 ● >120

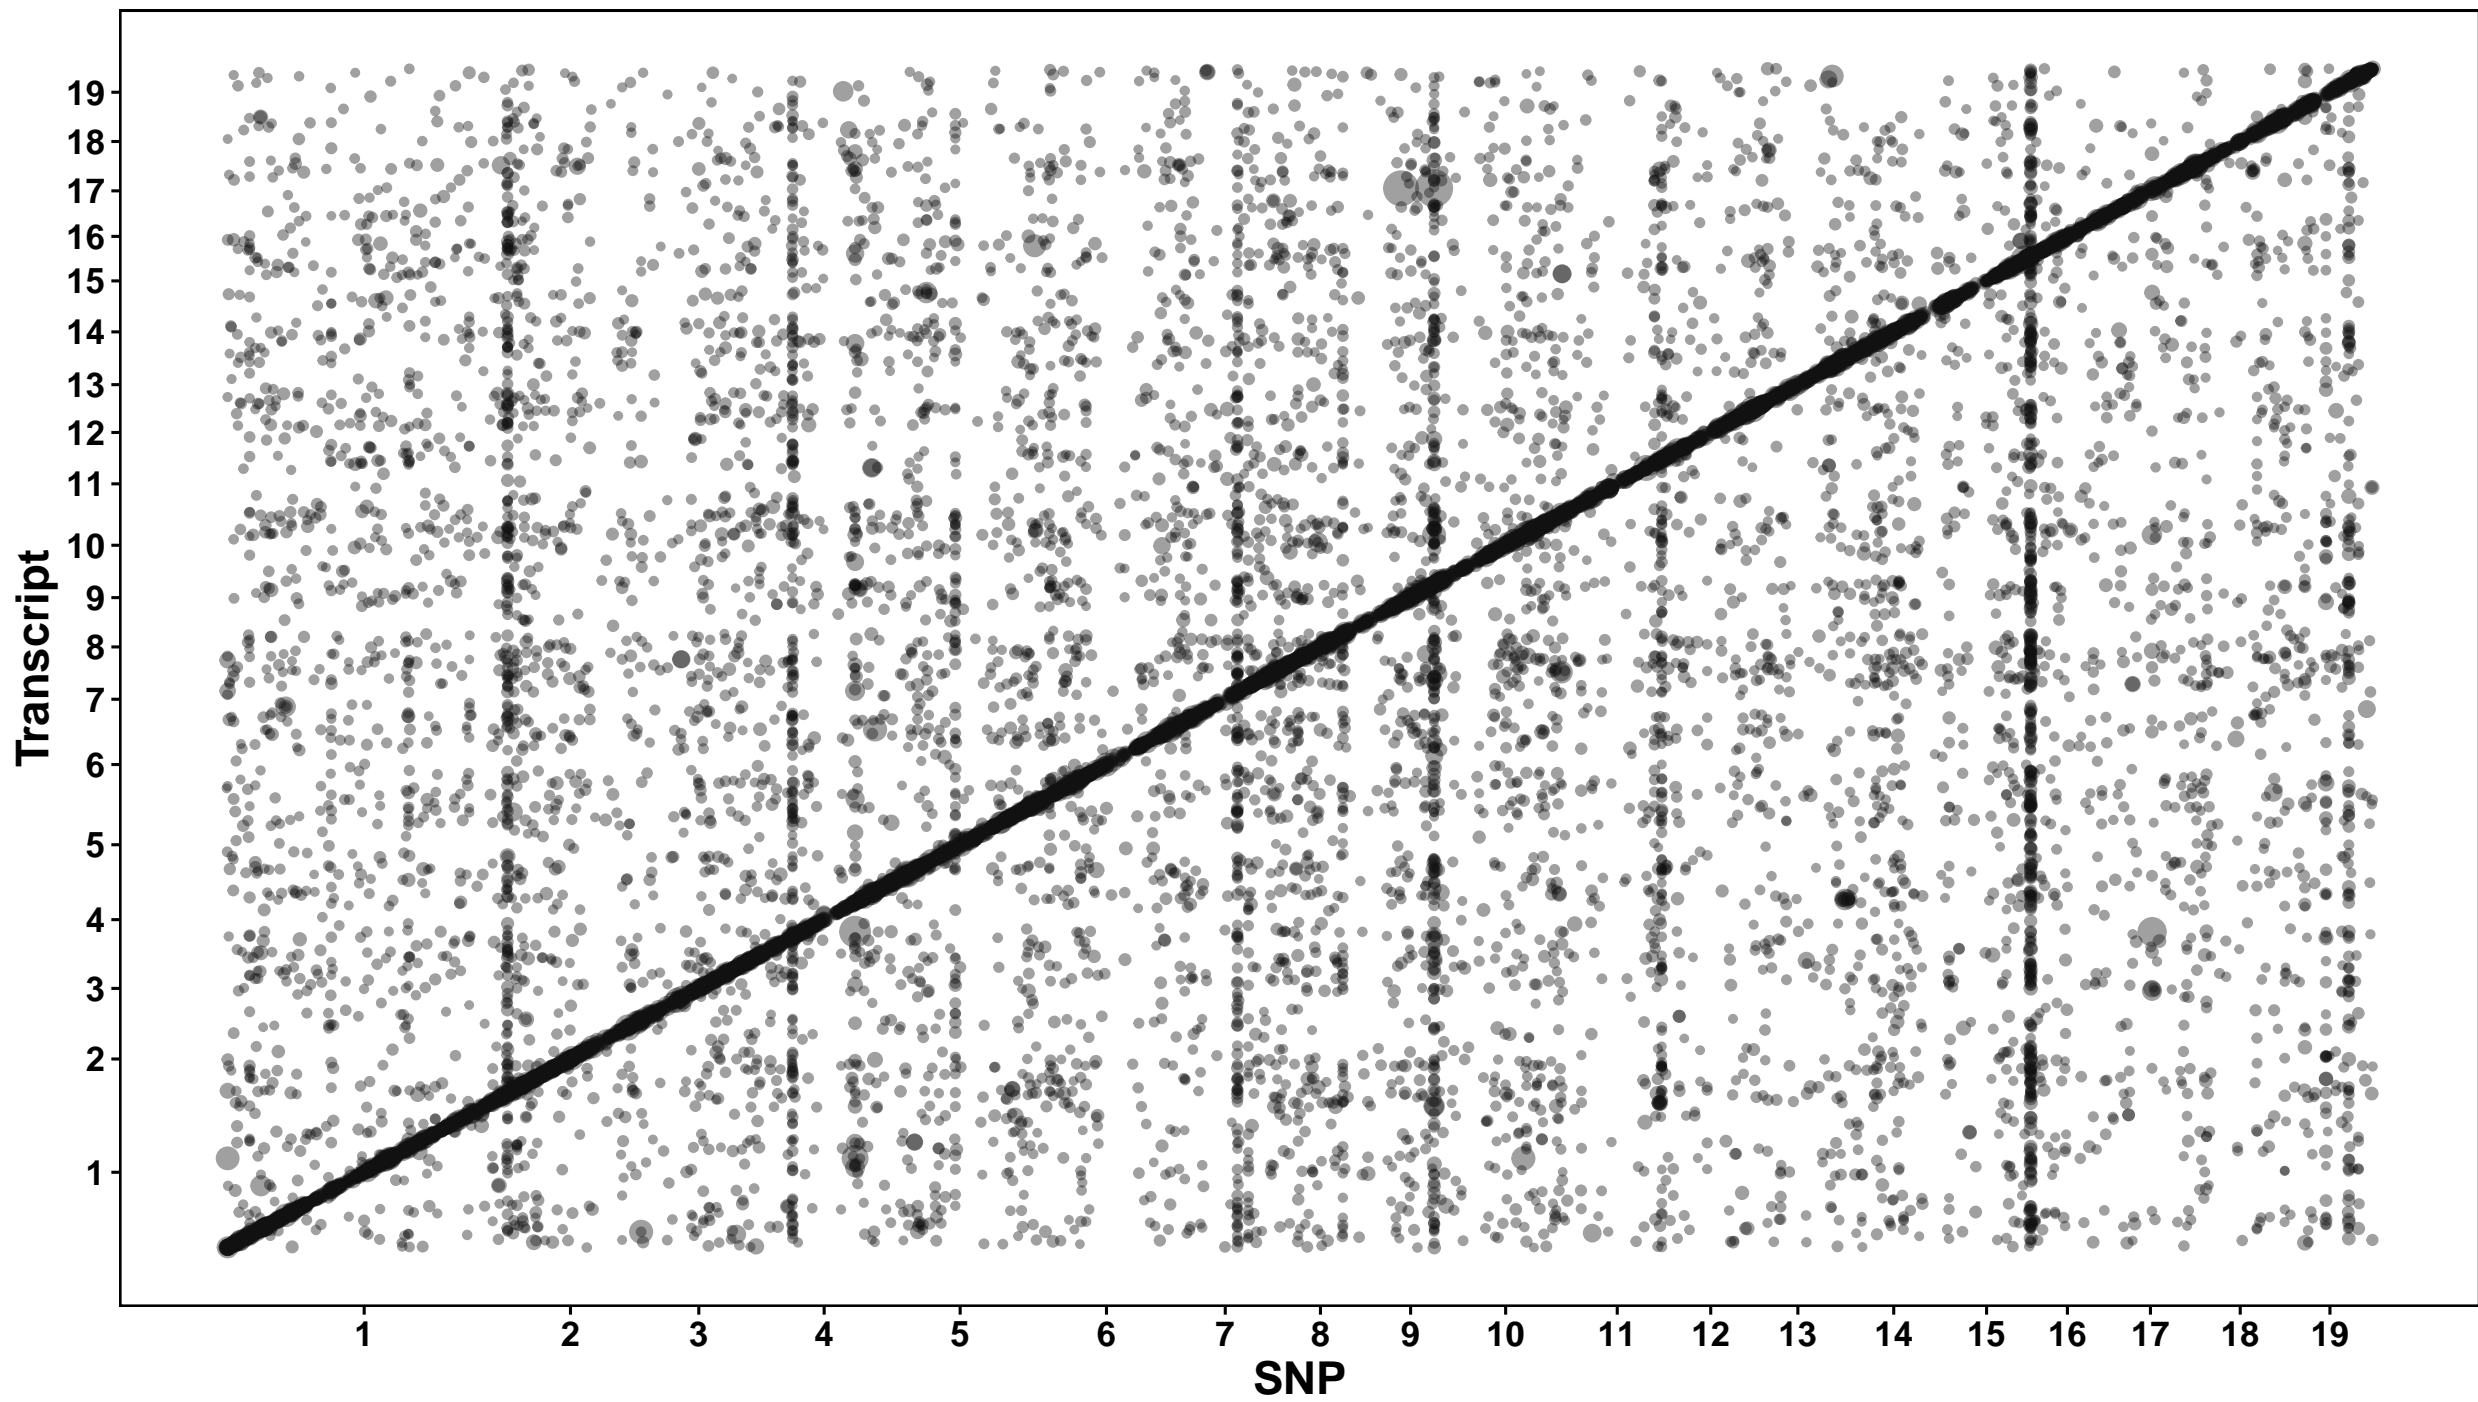

A) SNPs

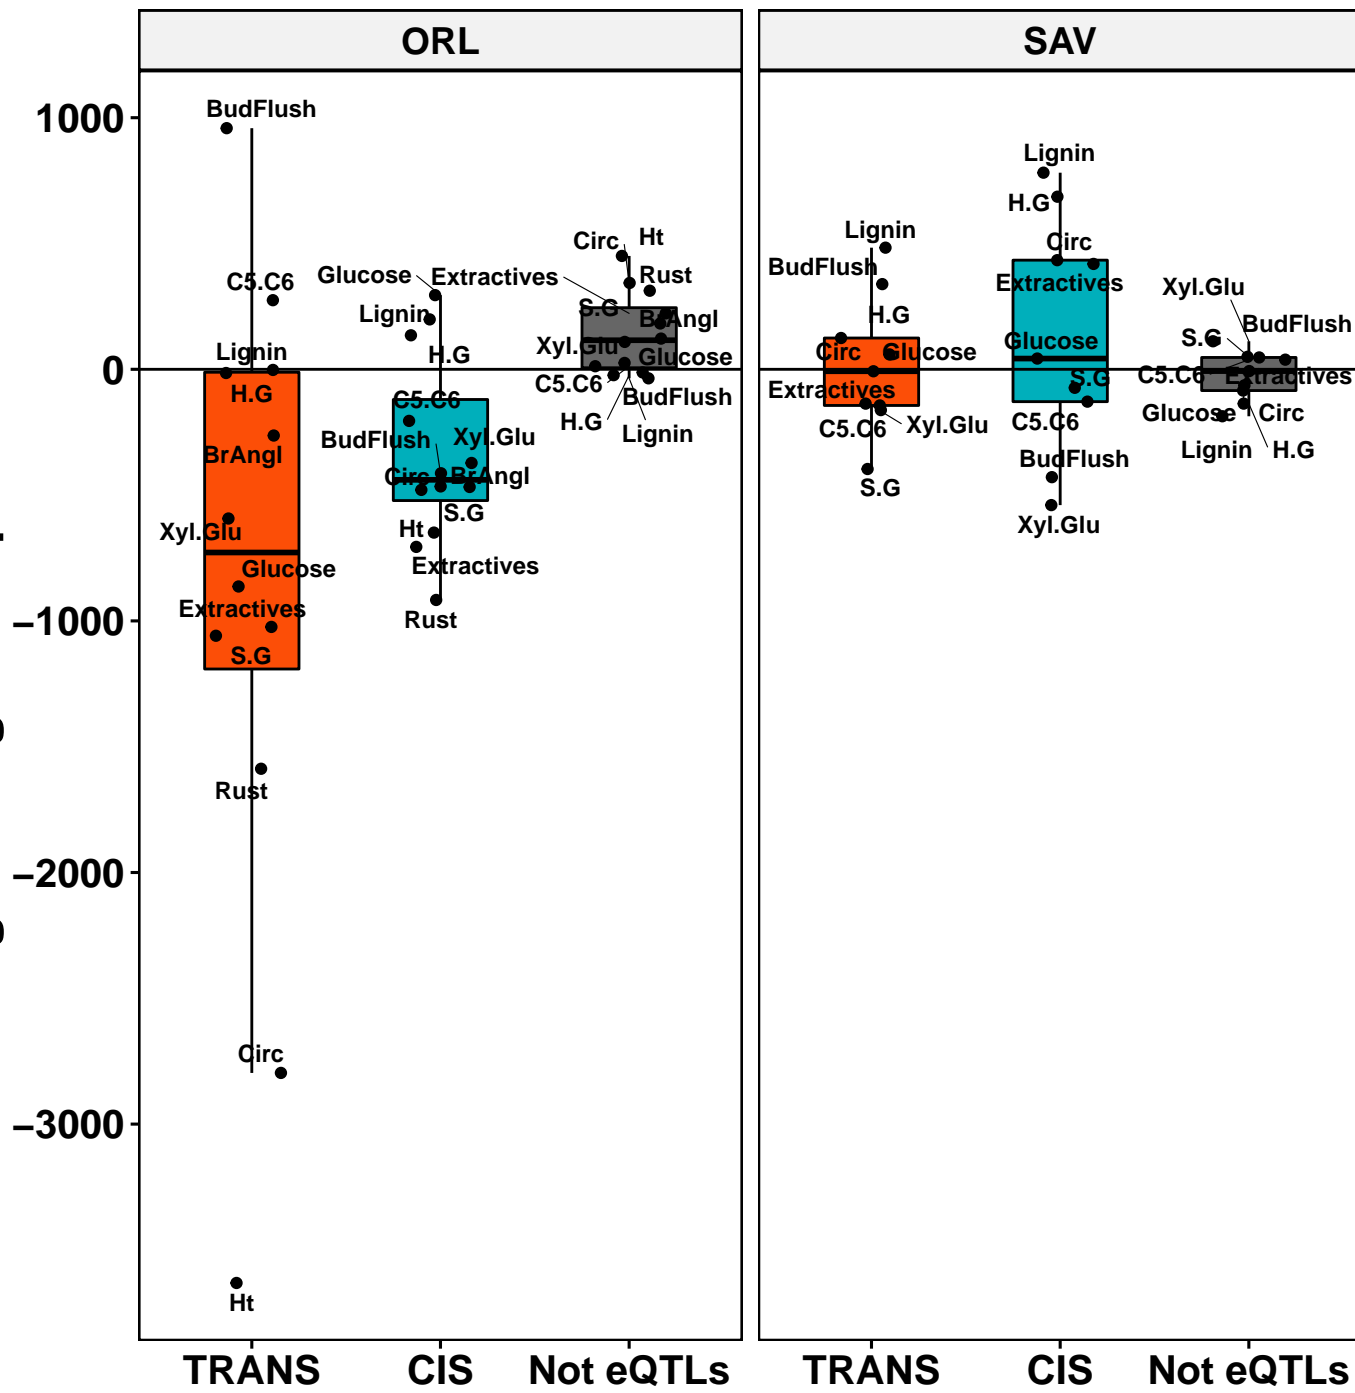

B) Transcripts

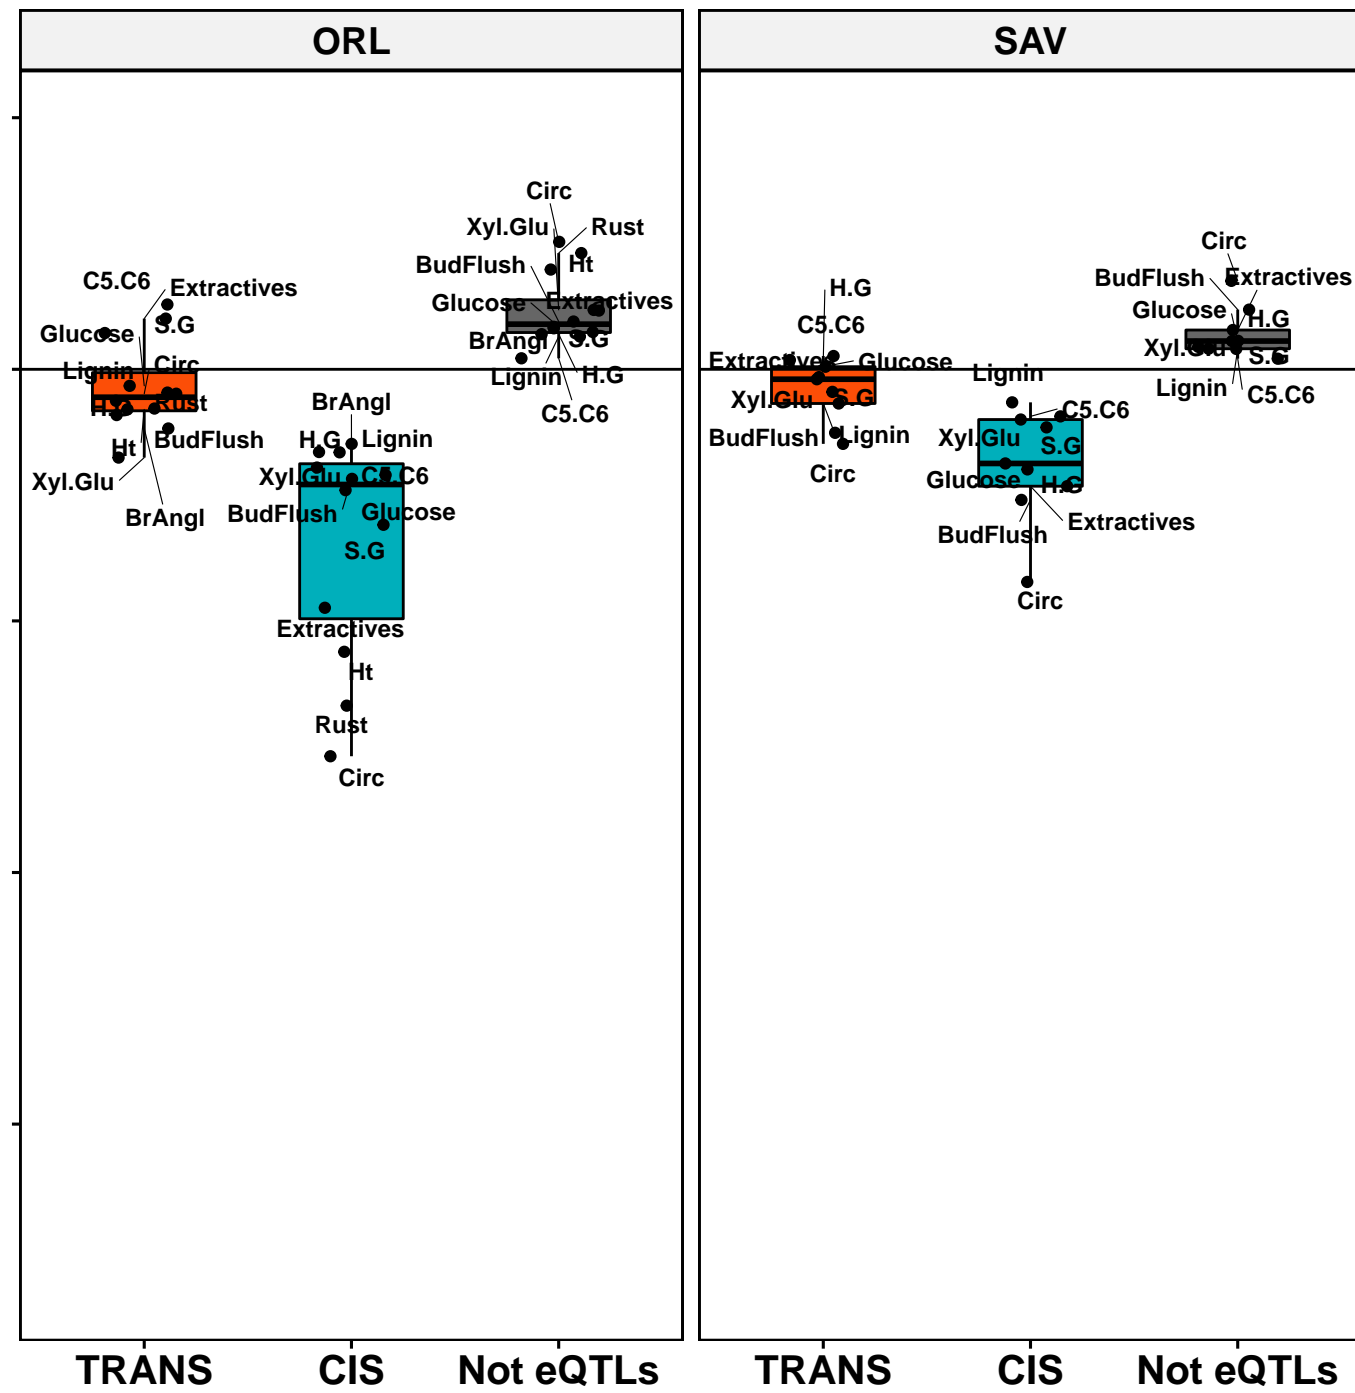

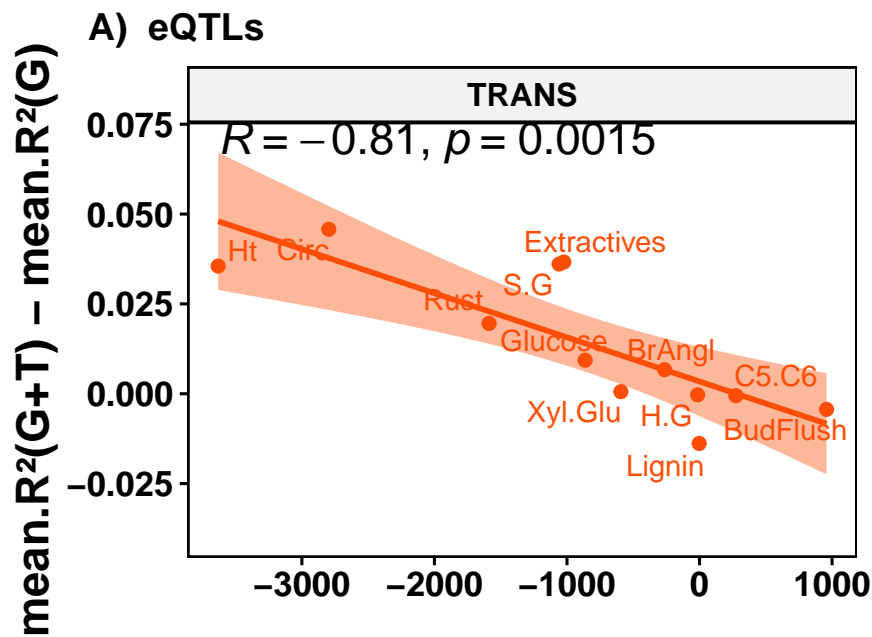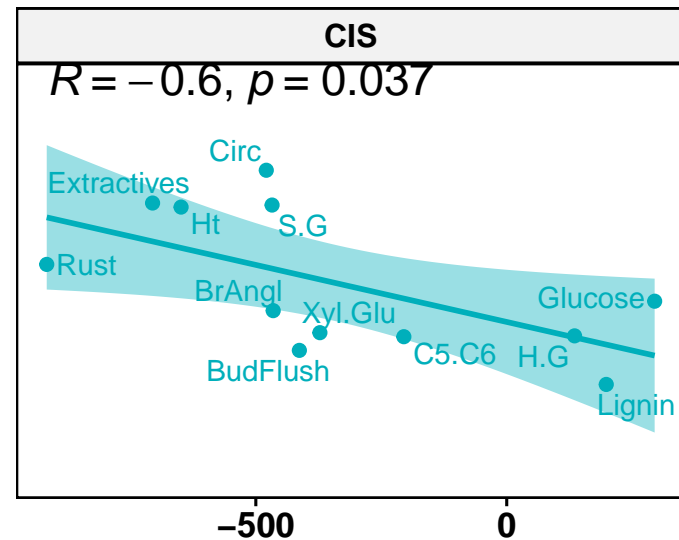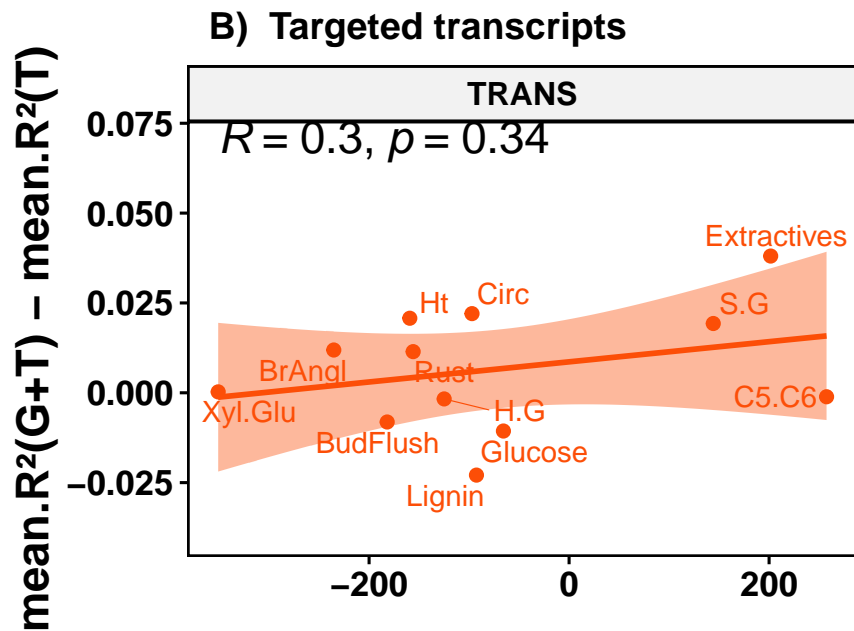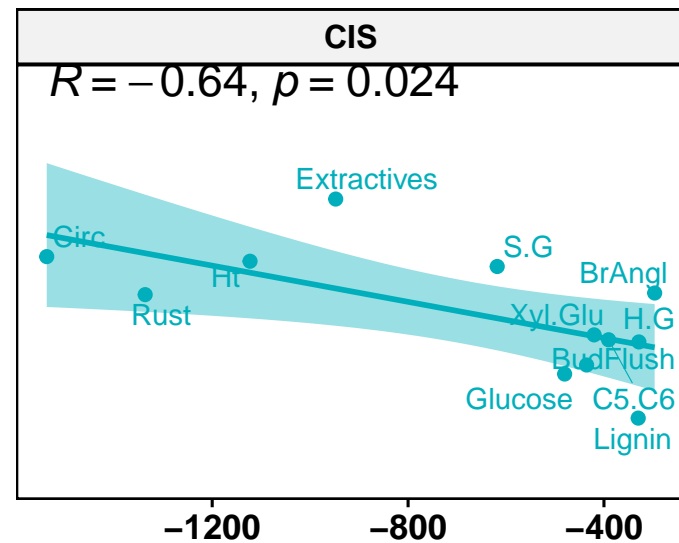

Average change in importance

A)

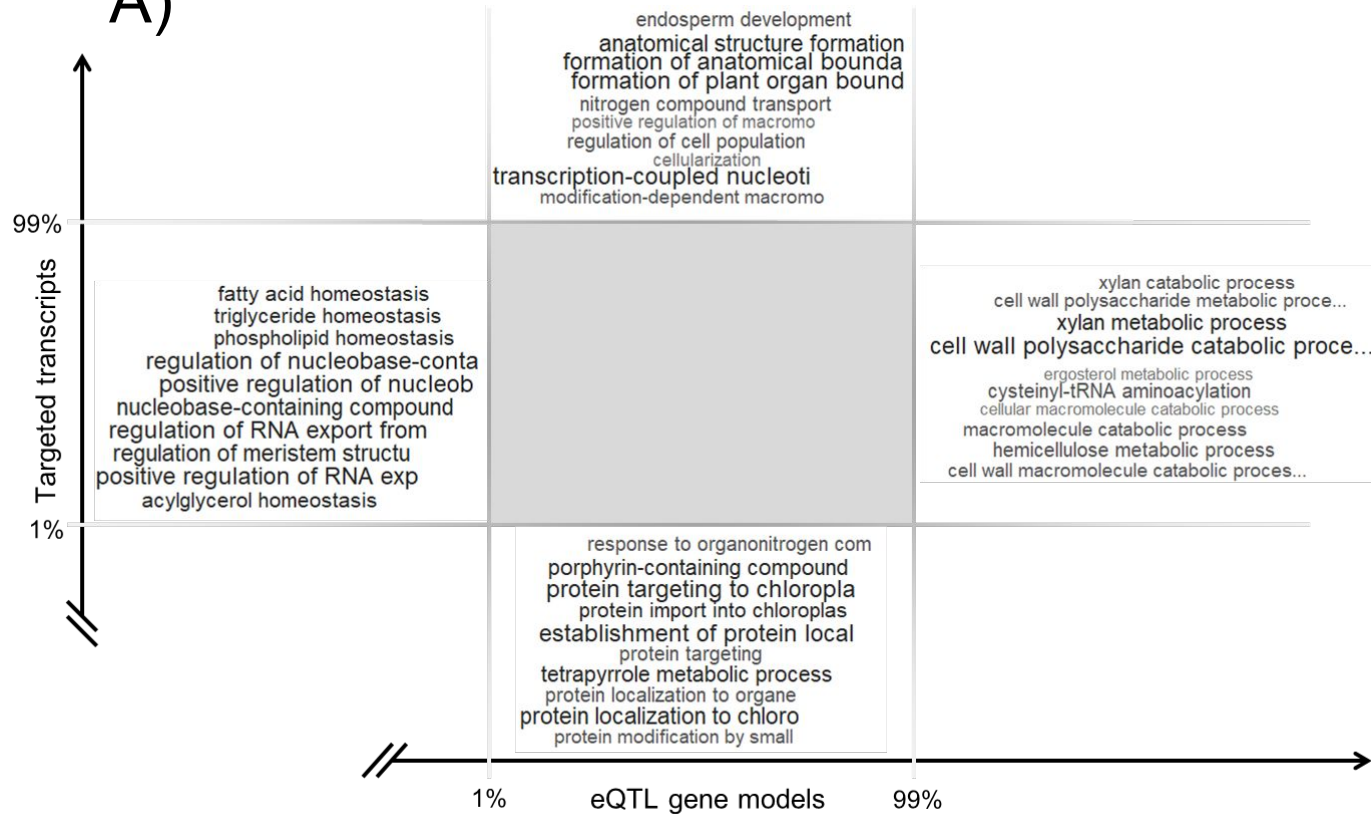

B)

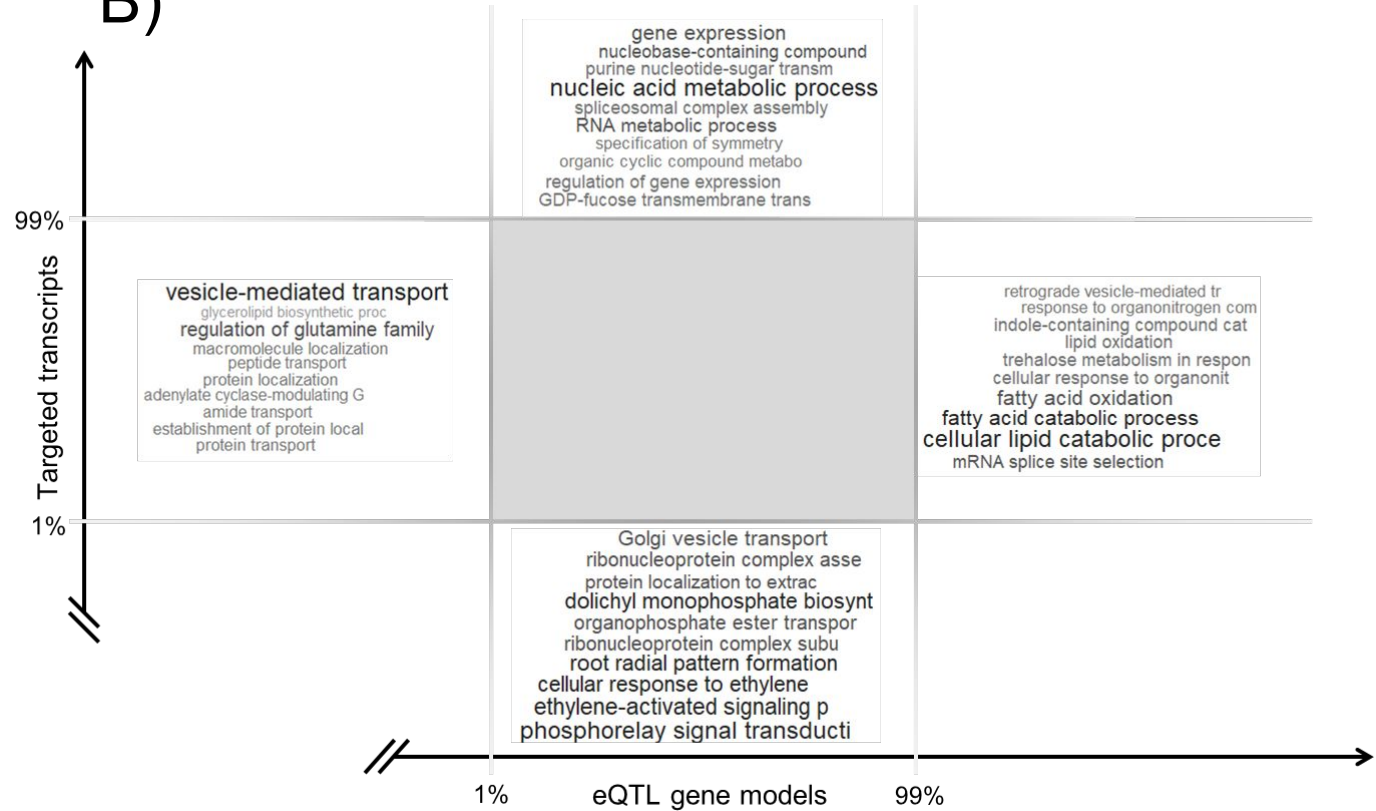

Source: https://www.biorxiv.org/content/biorxiv/early/2021/09/09/2021.09.07.459279.full.pdf
